1 **Attention periodically samples competing stimuli during binocular rivalry**

2

3 Matthew James Davidson<sup>1,2\*</sup>, David Alais<sup>3</sup>, Naotsugu Tsuchiya<sup>1,2</sup>, Jeroen J.A. van  
4 Boxtel<sup>1,2</sup>

5

6 <sup>1</sup>) School of Psychological Sciences, Faculty of Medicine, Nursing, and Health  
7 Sciences, Monash University.

8 <sup>2</sup>) Monash Institute of Cognitive and Clinical Neurosciences, Monash University.

9 <sup>3</sup>) School of Psychology, The University of Sydney.

10 \* corresponding author, lead contact.

11

12

13

14

15

16

17

18

19 **Abstract**

20 The attentional sampling hypothesis suggests that attention rhythmically enhances  
21 sensory processing when attending to a single (~8 Hz), or multiple (~4 Hz) objects.  
22 Here we investigated using binocular rivalry whether attention samples sensory  
23 representations that are not part of the conscious percept, during competition for  
24 perceptual dominance. When crossmodally cued toward a conscious image,  
25 subsequent changes in consciousness occurred at ~8 Hz, consistent with rates of  
26 undivided attentional sampling. However, when attention was cued toward the  
27 suppressed image, changes in consciousness slowed to ~3.5 Hz, indicating the  
28 division of attention away from the conscious visual image. In the  
29 electroencephalogram, we found that at 3.5 and 8 Hz, the strength of inter-trial phase  
30 coherence over fronto-temporal and parieto-occipital regions correlated with  
31 behavioral measures of changes in perception. When cues were not task-relevant,  
32 these effects disappeared, confirming that perceptual changes were dependent upon  
33 the allocation of attention, and that attention can flexibly sample away from a  
34 conscious image in a task-dependent manner.

35

36

37

38

39

## 40 **Introduction**

41 Recent behavioral and electrophysiological evidence suggests that despite our  
42 seamless visual experience, incoming visual information is periodically enhanced for  
43 analysis in the visual system (Rufin VanRullen, 2016a, 2016b; Zoefel & VanRullen,  
44 2017). This periodic sampling mechanism is proposed to result from the allocation of  
45 visual attention (Busch & VanRullen, 2010; VanRullen, Carlson, & Cavanagh, 2007;  
46 Zoefel & VanRullen, 2017), wherein alternating windows of high and low attentional  
47 resources operate to parcel incoming visual information, similar to the sequential  
48 frames that capture film within a video camera (Chakravarthi & VanRullen, 2012;  
49 VanRullen & Dubois, 2011). Whether stimuli are presented at the appropriate phase  
50 (Busch, Dubois, & VanRullen, 2009; Mathewson, Gratton, Fabiani, Beck, & Ro,  
51 2009; VanRullen et al., 2007) or location (Dugué, McLelland, Lajous, & VanRullen,  
52 2015; Dugué, Xue, & Carrasco, 2017; Dugué & VanRullen, 2014; Huang, Chen, &  
53 Luo, 2015; Landau & Fries, 2012) of this sampling mechanism has been shown to  
54 modulate the accurate detection of a visual stimulus, in stark contrast to our  
55 experience of an uninterrupted visual environment.

56 To date, primary neural evidence for the rhythmic gating of visual processing  
57 stems from the dependence of target detection on the pre-target phase of neural  
58 oscillations at approximately 7-8 Hz (Busch & VanRullen, 2010; Busch et al., 2009).  
59 These spontaneous fluctuations in detection may result from the allocation of visual  
60 attention toward a single location (Busch & VanRullen, 2010; Dugué et al., 2015;  
61 Spaak, de Lange, & Jensen, 2014; VanRullen, 2016a; Zoefel & VanRullen, 2017),  
62 and support the assumption that neural excitability cycles gate and filter incoming  
63 information for further processing (Schroeder & Lakatos, 2009; VanRullen, 2013;  
64 Zoefel & VanRullen, 2017).

65           This periodic gating of visual perception is also prominent behaviorally in the  
66 time-course of detection accuracy. Spectral analyses applied to high temporal  
67 resolution behavioral measures reveal 7-8 Hz modulations in performance following  
68 cues to reorient attention (Dugué et al., 2015; Fiebelkorn, Saalman, & Kastner,  
69 2013), which slow proportionately when attention is divided between two or more  
70 locations (e.g. Chen, Wang, Wang, Tang, & Zhang, 2017; Holcombe & Chen, 2013;  
71 Huang et al., 2015; Landau & Fries, 2012; Landau, Schreyer, van Pelt, & Fries, 2015;  
72 VanRullen, 2013). For example, Landau and Fries (2012) observed that following a  
73 cue to reorient attention to either the left or right visual hemifield, target detection  
74 oscillated at a 4 Hz counterphase rhythm depending on whether cues were congruent  
75 or incongruent with the target location. Critically, this counterphase sampling of  
76 visual information persisted at ~ 4 Hz when attention was directed to two locations on  
77 a single object (Fiebelkorn et al., 2013), and when cues to reorient attention were  
78 incongruent with target location – requiring a subsequent shift in the allocation of  
79 attention to a second location (Huang et al., 2015). These successive fluctuations in  
80 target detection and counterphase sampling between locations have led to the  
81 suggestion that an intrinsic ~7-8 Hz attentional rhythm can be allocated over space  
82 and time in a sequential manner (Fiebelkorn et al., 2013; A. O. Holcombe & Chen,  
83 2013; Landau & Fries, 2012; VanRullen, 2013; Zoefel & VanRullen, 2017).

84           Here, we tested if rhythmic attentional sampling is at play during binocular  
85 rivalry. During binocular rivalry, incompatible images are presented to each eye  
86 which results in stochastic perceptual alternations, with one image visible at a time  
87 while the other is suppressed (Alais, 2012; Alais & Blake, 2005; Maier,  
88 Panagiotaropoulos, Tsuchiya, & Keliris, 2012). In an experiment designed to induce  
89 or delay these transitions using crossmodal cues, we found that changes in

90 consciousness were occurring rhythmically after the reorientation of attention. These  
91 fluctuations occurred depending on whether the crossmodal cue directed attention  
92 toward either the dominant or suppressed visual image, resulting in ~8 Hz and ~ 3.5  
93 Hz oscillations, respectively. Critically, these rhythms were observed in both behavior  
94 and the electroencephalogram (EEG), and were absent when cues were not task-  
95 relevant. This approximate halving of frequency suggests that when non-visual input  
96 is inconsistent with the ongoing visual percept, attentional sampling can flexibly  
97 orient away from a consciously perceived image, seemingly ‘searching for’  
98 alternative sensory information to resolve the conflict.

## 99 **Results**

### 100 **Attending to low-frequency crossmodal stimulation promotes the perceptual** 101 **dominance of low-frequency flicker during binocular rivalry**

102 We manipulated the conscious visibility of images across two sessions of 24 x 3-  
103 minute binocular rivalry blocks. Subjects ( $N=34$ ) continuously reported the content of  
104 their visual consciousness via button press to indicate which image they currently  
105 perceived, while neural activity was simultaneously recorded via 64-channel EEG  
106 (see Methods). Rivalry stimuli were orthogonal sinusoidal gratings which underwent  
107 contrast modulation, one at 4.5 Hz and the other at 20 Hz (Figure 1a). In each 3-  
108 minute block, we intermittently presented 12 crossmodal cues (mean duration 2.6 s),  
109 which were amplitude-modulated signals presented in the auditory and/or tactile  
110 modality at a frequency congruent with one of the visual stimuli (4.5 or 20 Hz). Three  
111 null cues (visual-only periods) without any crossmodal stimulation were also  
112 presented to increase the uncertainty of stimulus timing. The visual-only periods also  
113 served as a baseline to compare the behavioral effects of crossmodal cues (see below).

114 All cue periods were separated by jittering the ISI between 7-10 s. As a result, the  
115 timing of the crossmodal cues were controlled completely independently from the  
116 perceptual reports, and were presented at any point relative to the onset of the  
117 currently dominant percept (i.e., no closed-loop control).

118 In order to investigate whether the allocation of attention to crossmodal cues  
119 alters the contents of visual consciousness during binocular rivalry, we varied  
120 attentional instructions over two sessions of the experiment. For one of their two  
121 sessions (day 1 for  $n=16$ , day 2 for  $n=18$ ), we asked subjects to count the number of  
122 times that the temporal frequency of crossmodal cues coincided with their conscious  
123 visual percept at crossmodal cue offset (see Methods). For their other session,  
124 subjects were instructed to focus on reporting their visual percept alone – ignoring  
125 any crossmodal cues.

126 Following the onset of a crossmodal cue, the probability of perceiving a  
127 congruent visual image increased only during attended low-frequency cues compared  
128 to all other cue types, during the period 0.68 to 3.97 s after cue onset (repeated  
129 measures ANOVAs followed by planned comparisons, FDR  $q = .05$ , Figure 1b). To  
130 confirm that this effect was due to attention, we performed a correlation-based  
131 behavioral analysis. First, we computed the correlation coefficient (x-axis in Figure  
132 1c), between each subject's verbally reported number of congruent cues (i.e., their  
133 attentional task during attend conditions), to the actual number of cues that were  
134 congruent with their visual percepts based on button-press data. Second, we defined  
135 the strength of the crossmodal cueing effect for attended low-frequency cues  
136 compared to other cue types (y-axis in Figure 1c), as the difference in the probability  
137 of seeing the congruent visual flicker during 1 to 4 s after cue onset. We call this the  
138 perceptual switch index (PSI), as it reflects the degree of perceptual switch after cue

139 onset. The magnitude of these two variables displayed a strong positive correlation  
140 ( $r(32) = .46, p = .006$ , two-tailed), suggesting that the cross-modal cueing effect was  
141 indeed mediated by attention.

142         Due to the ongoing dynamics of binocular rivalry, this cueing effect can be  
143 calculated when visual and crossmodal information mismatched or matched at cue  
144 onset. When crossmodal cues mismatched with the visual percept at cue onset, the  
145 likelihood of switching to the previously suppressed, yet matched visual stimuli  
146 significantly increased for attended low-frequency cues compared to all other cue  
147 types over a time period from 0.62 to 4.12 s (FDR  $q = .05$ , Figure 1d). By contrast,  
148 when visual and crossmodal cues matched at cue onset, the effect of attending to low-  
149 frequency crossmodal cues delayed changes to the previously suppressed visual  
150 percept compared to all other cue types, over the period from 1.05 to 3.58 s (FDR  $q =$   
151  $.05$ , Figure 1e). Comparison against the visual-only cue period yielded the same  
152 conclusion, confirming that the attended low-frequency cues significantly influenced  
153 rivalry dynamics, while other cue types did not. As the overall crossmodal effects  
154 were unique to the attended low-frequency condition, we focused our subsequent  
155 attentional sampling and EEG analysis on this condition.

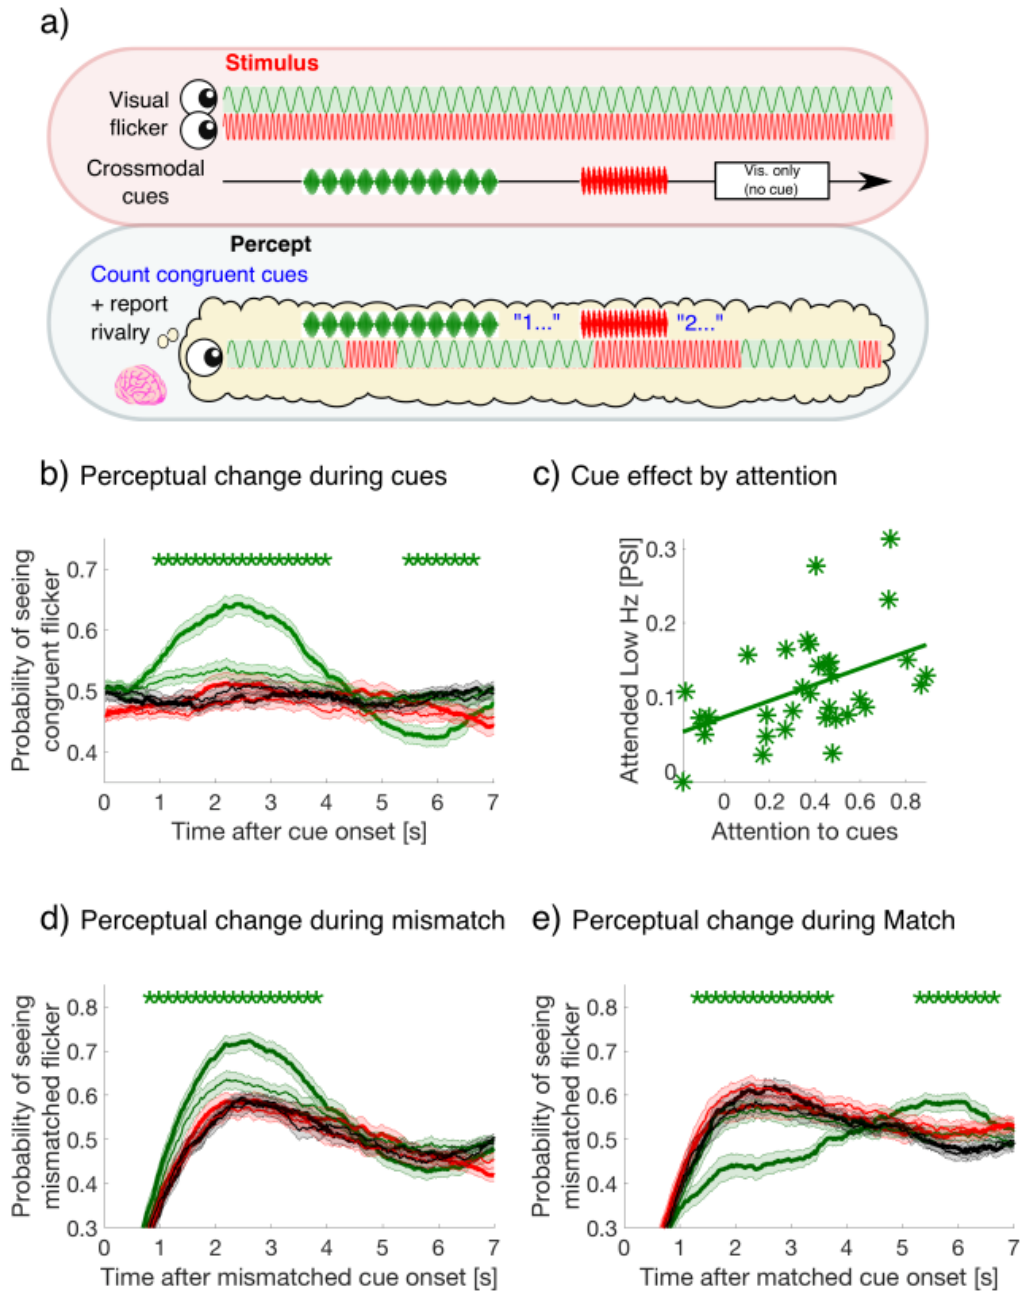

156

157

158 *Figure 1. Experimental paradigm and behavioral results. a) A schematic time course*  
 159 *showing stimulus presentation and reported visual percept. Each eye was presented*  
 160 *with a 4.5 or 20 Hz sinusoidal flicker throughout 3-min blocks. Subjects reported*  
 161 *their perceptual state through button press. Crossmodal cues (also 4.5 or 20 Hz; 2,*  
 162 *3.1 or 4s in duration) or visual-only periods (2.6s in duration) were separated by*  
 163 *inter-stimulus intervals of 7-10 s. b) Button-press data, aligned at cue onset, were*  
 164 *averaged over all crossmodal cue and visual-only periods per subject, then averaged*  
 165 *over subjects for each cue condition. Y-axis represents the proportion of button-*  
 166 *presses reporting congruent crossmodal and visual flicker at each time point,*  
 167 *sampled at 60 Hz (or every 16.7 ms). Colored lines and their shading show mean  $\pm 1$*



168 *standard error across 34 subjects during attended and ignored cues (thick and thin*  
169 *lines) and low and high frequency (green and red colors). Black lines represent the*  
170 *equivalent probability for visual-only periods, **servicing as baseline (Methods).***  
171 *Asterisks indicate a significant difference between cues at each time point (repeated-*  
172 *measures ANOVA followed by planned comparisons). We use FDR  $q = .05$  for the*  
173 *statistical threshold unless noted otherwise. c) Crossmodal effects are mediated by*  
174 *task-relevant attention. Our measure of crossmodal effects, the perceptual switch*  
175 *index (PSI, y-axis), is defined as the mean difference for the probability of seeing*  
176 *congruent flicker during 1-4 sec after the cue onset for attended-low-frequency cues*  
177 *(solid green in panel b) compared to other cue types. Attention-task performance (x-*  
178 *axis) is the correlation coefficient between the reported and actual congruent stimuli*  
179 *when comparing between rivalry percepts and crossmodal cues at offset (See Methods*  
180 *for details). The across-subject correlation between the two variables was strong*  
181 *( $r(32) = .46, p = .006$ , two-tailed), demonstrating the crossmodal effects were*  
182 *strongly dependent on performance during the attention task. d) and e) Button-press*  
183 *data aligned at cue onset, with lines and shading as in panel b). Y-axis showing the*  
184 *proportion of button-presses reporting the mismatched flicker at each time point,*  
185 *after d) visual-crossmodal mismatch, or e) visual-crossmodal match at cue onset.*  
186 *Only the data of the attended-low-frequency condition differed significantly from the*  
187 *other conditions, including visual only periods.*  
188

## 189 **Binocular rivalry dynamics after mismatched and matched crossmodal cues**

190 Our previous analysis showed that relative to matched crossmodal cues,  
191 mismatched crossmodal cues lead to more perceptual switches, as the visually  
192 perceived image changed to become congruent with the crossmodal input. In the  
193 context of the attentional sampling hypothesis, we directly tested if these changes  
194 were occurring rhythmically after the reorientation of attention, and specifically  
195 investigated the timing of the *first* switch after cue onset, defined as the first change in  
196 button-state after cue onset.

197 To determine if cues affected the timing of first switches, we calculated the  
198 cumulative density function of each subject's first switches after cue onset (Figure  
199 2a). Compared to visual-only cue periods, first-switches after cue onset occurred  
200 earlier for mismatched cues, indicating an earlier change to the congruent, previously  
201 suppressed, visual flicker. By contrast, following matched cues first-switches during

202 rivalry were delayed, indicating an extended maintenance of the congruent visual  
203 percept when matched with attended low-frequency crossmodal cues. The facilitation  
204 of switches by mismatched cues was observed from 0.63 to 2.45 s and 3.78 to 6.87 s  
205 relative to cue onset, with matched cues delaying switches from 1.27 to 3.77 s after  
206 onset (paired samples *t*-tests, FDR  $q = .05$ , in Figure 2b).

207         After cue onset, the time-course for the probability of first switches displayed  
208 oscillatory patterns for mismatched and matched conditions (Figure 2c and d), but not  
209 the visual only condition (Figure 2e). Each data point represents the proportion of first  
210 switches which occurred at each time bin (16.7 ms intervals), calculated first per  
211 individual, and then averaged across subjects (subject-level data is shown in Figure  
212 S1).

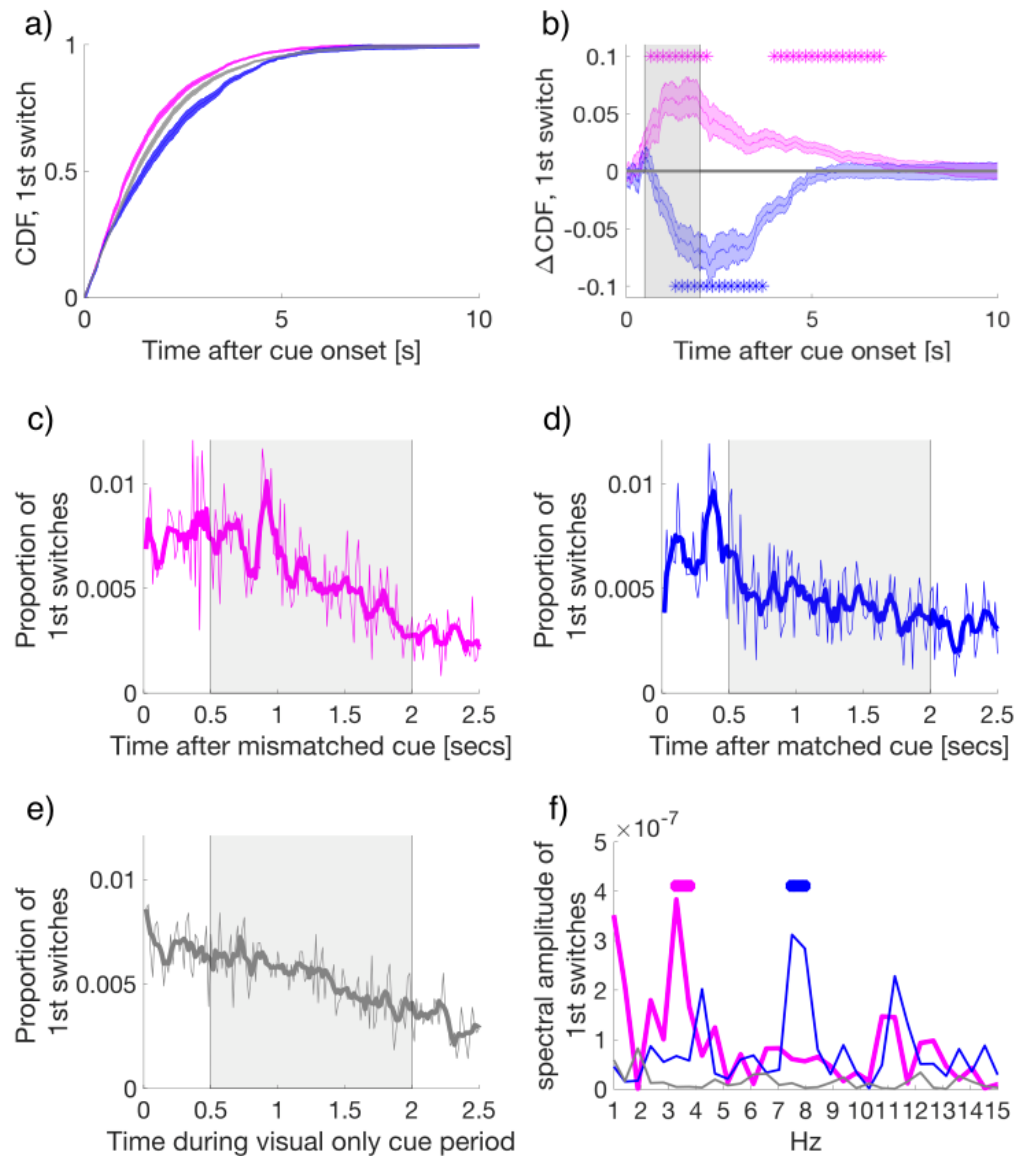

213

214 *Figure 2. a) The cumulative density function (CDF) of the time to first-switch.*  
 215 *Mismatched, matched, and visual-only conditions are colored in magenta, blue, and*  
 216 *grey in all panels a-f. Lines and shading show mean and standard error across*  
 217 *subjects (N=34) for a and b. b) The difference in CDFs between conditions. Asterisks*  
 218 *mark statistical significance (paired-samples t-tests) comparing mismatched or*  
 219 *matched cues to visual-only periods. FDR  $q = .05$ . c-e) The time course of the*  
 220 *proportion of first switches made after cue onset in c) mismatched, d) matched, and e)*  
 221 *visual-only conditions. Thin lines show the mean proportion of first-switches, binned*  
 222 *in 16.7 ms increments and averaged across subjects. Thick lines show the smoothed*  
 223 *data for visualization. Grey shaded regions show the time window used for spectral*  
 224 *analysis in f). f) The amplitude spectra for the time course of switches in conditions*  
 225 *in c-e). Asterisks indicate significant clusters (at least two neighboring frequency*  
 226 *bins) after permutation and cluster-based corrections for multiple comparisons (see*  
 227 *Methods). The permuted null distribution and critical value for the identified clusters*  
 228 *in f) are shown in Figure S3)*

229

230           To quantify these patterns, we applied the Fourier transform to the period 0.5  
231 to 2 s after cue onset (skipping the first 0.5 s to avoid an onset transient, see Figure  
232 S2) as performed by previous investigations of attentional sampling (Laura Dugué et  
233 al., 2015; Laura Dugué, Roberts, & Carrasco, 2016; Fiebelkorn et al., 2013; Landau &  
234 Fries, 2012). For this analyses, we corrected for multiple comparisons by using non-  
235 parametric cluster-based permutations (Maris & Oostenveld, 2007), with thresholds  
236 set to  $p < .005$  (Benjamin et al., 2017) for identification within a cluster, and a final  
237 critical value for significance set to  $p = .05$ , cluster corrected (see Methods).

238           Strikingly, when the temporal frequency of the cue matched the conscious  
239 visual flicker at cue onset, the first perceptual switches followed a 7.5-8 Hz rhythm  
240 ( $p_{cluster} < .001$ , Figure 2f blue), consistent with findings that show attention samples  
241 from single locations at a rate of approximately 7-8 Hz (Laura Dugué et al., 2015;  
242 Fiebelkorn et al., 2013). However, when crossmodal cues were mismatched with the  
243 dominant visual image at cue onset, the amplitude spectrum of perceptual switches  
244 peaked between 3.3-3.75 Hz ( $p_{cluster} < .001$ , Figure 2f magenta). This slower rhythm  
245 of perceptual changes is consistent with findings that show attention samples two  
246 locations at a rate of approximately 3.5-4 Hz (Fiebelkorn et al., 2013; Landau & Fries,  
247 2012; Landau et al., 2015). No significant peaks were detected for the visual only  
248 condition (Figure 2f, gray). As to the remaining three cue combinations (attended  
249 high-, ignored low- and ignored high-frequency cues), all failed to exhibit any  
250 significant crossmodal effects on perceptual switches compared to visual only periods  
251 (shown Figure 1b, d, e, and Figure S4). Thus, we did not pursue further spectral or  
252 neural analyses of these conditions.

253

## 254 **The neural correlates of divided and focused attentional sampling**

255           We hypothesized that at our behaviorally observed attentional sampling  
256 frequencies (3.5 and 8 Hz), we should be able to identify the neural correlates of  
257 attentional sampling in the EEG signal using an inter-trial phase coherence (ITPC)  
258 measure. Previously, the phase of ongoing cortical oscillations have been shown to be  
259 reset by external crossmodal events (Frey, Ruhnau, & Weisz, 2015; Lakatos et al.,  
260 2009; Mercier et al., 2013; Romei, Gross, & Thut, 2012; van Atteveldt, Murray, Thut,  
261 & Schroeder, 2014) and to modulate the probability of target detection (Busch et al.,  
262 2009; Landau et al., 2015; Mathewson et al., 2009; Thorne & Debener, 2014;  
263 VanRullen et al., 2007). To isolate the specific neural correlates of attentional  
264 sampling we compared the evoked ITPC, the increase in ITPC during 0 to 2 s after  
265 onset compared to -2 to 0 s before onset, in mismatched and matched cue conditions  
266 at the attentional sampling frequencies (3.5 and 8 Hz). Importantly, in these  
267 conditions, the physical sensory input was identical (i.e., attending low-frequency  
268 tones during binocular rivalry), with the only difference between cues being the  
269 subject's percept at cue onset. Thus, any differences between conditions reflect  
270 differences due to crossmodal mismatch or match with the subjective visual percept.

271           For this analysis, we retained electrodes only after identification of a  
272 significant effect ( $p < .05$ , uncorrected) which also satisfied a spatial cluster-based  
273 criterion for selection (Maris & Oostenveld, 2007), and used non-parametric  
274 permutation distributions to control for multiple comparisons (Maris & Oostenveld,  
275 2007; Figure S5). We found that the mismatched cues induced stronger ITPC than the  
276 matched cues, at 3.5 Hz over right fronto-central-temporal electrodes [FT8, C6]  
277 (Figure 3a) and at 8 Hz over right parietal-occipital electrodes [P6, PO8] (Figure 3e).  
278 Figures 3b and f compare the evoked ITPC spectra in these regions based on

279 mismatched and matched subjective percepts at cue onset, and confirm that our time  
280 window was long enough to distinguish the 3.5 from 4.5 Hz stimulus response (with  
281 half bandwidth = 0.5 Hz to resolve the frequency of interest).

282

### 283 **Attentional-sampling ITPC strength predicts perceptual outcome**

284       Next, we investigated whether the evoked ITPC at the attentional-sampling  
285 frequencies in the above-identified regions (Figures 3a and e) predicted the magnitude  
286 of behavioral effects across subjects, shown in Figure 1d-e. We again computed the  
287 difference in behavioral effects when comparing attended low-frequency to all other  
288 cue types (PSI; 2:4 s after cue onset), as a measure for the degree of perceptual  
289 change following mismatched and matched cues. Note that when considering a wider  
290 time-window (0:4s for behavioral effects, data not shown) a similar pattern of results  
291 was obtained, though weaker due to the lack of differences between cue types in early  
292 cue periods (i.e. 0:1s, cf. Figure 1d-e). We used the evoked ITPC from 0 to 2s after  
293 cue onset to restrict our analysis to within attended crossmodal cueing periods (which  
294 were 2, 3.1 and 4s in duration), and to capture the period where the majority of first  
295 switches were made after cue onset (Figure 2c and d). Similar to the PSI, we also  
296 subtracted the evoked ITPC across all other conditions from those in the attended  
297 low-frequency condition, and abbreviate this as the normalized ITPC (nITPC) below.

298       In the right fronto-central-temporal electrodes ([FT8, C6]) which significantly  
299 differed in 3.5Hz ITPC based on mismatched or matched percepts (Figure 3a), we  
300 found that 3.5 Hz nITPC and PSI were positively correlated for both mismatched  
301 ( $r(32) = .39, p = .024$ , two-tailed, Figure 3c), and matched cue types ( $r(32) = .40, p =$   
302  $.018$ , two-tailed, Figure 3d). Indicating that for both mismatched and matched cues,

303 increases in 3.5 Hz nITPC facilitated a change in visual consciousness across subjects  
304 (Figure 3c-d).

305           In the parieto-occipital electrodes ([P6, PO8]), we found that 8 Hz ITPC was  
306 not correlated with the PSI for mismatched cues (Figure 3g). However, 8 Hz ITPC  
307 was negatively correlated with the PSI during matched cues ( $r(32) = -.38, p = .026$ ,  
308 two-tailed, Figure 3h), demonstrating that increased 8Hz nITPC resulted in fewer  
309 perceptual switches across subjects.

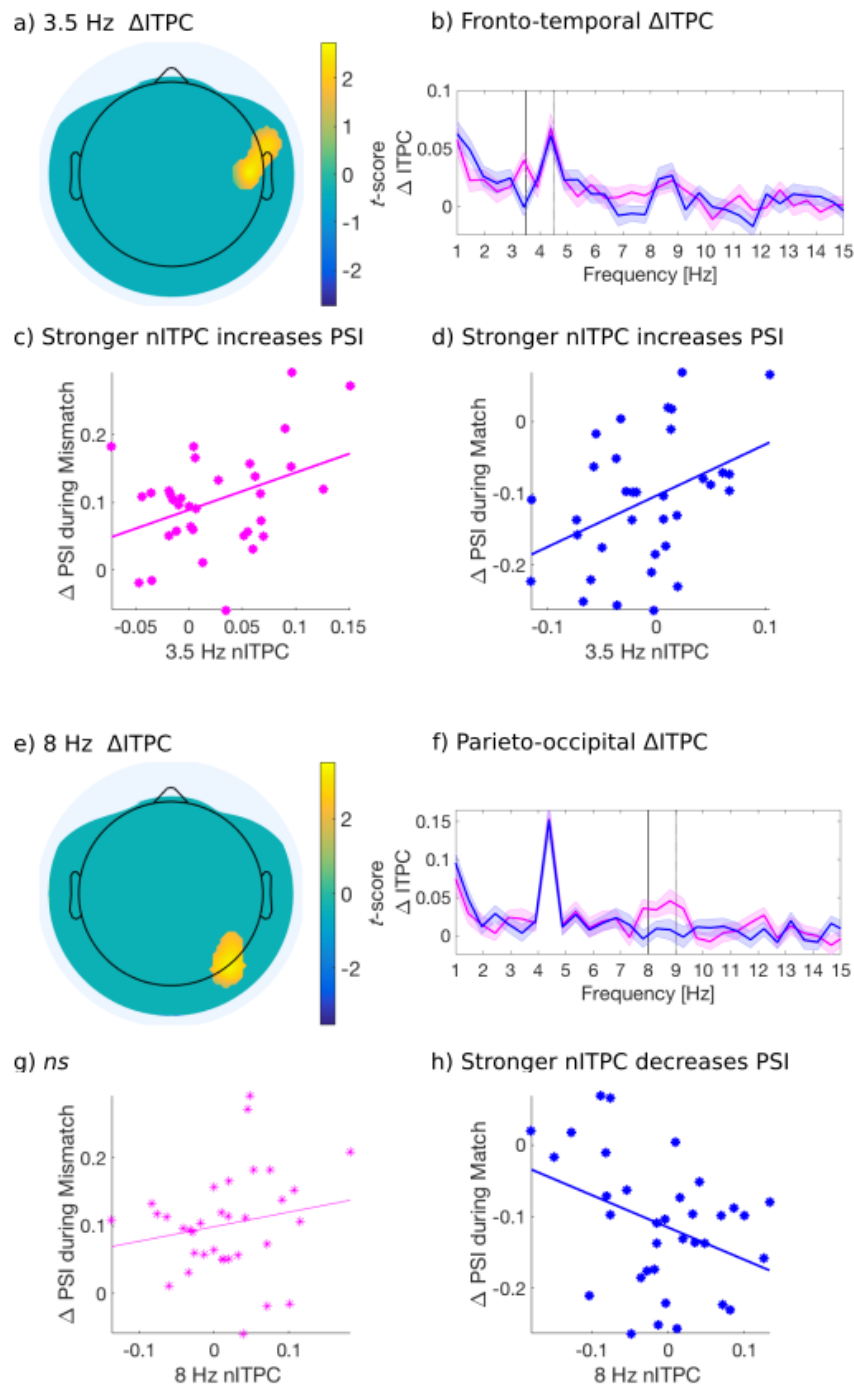

310

311 *Figure 3. Evoked ITPC at 3.5 Hz (a-d) and 8 Hz (e-h) mediates the probability of*  
 312 *switches during rivalry. a, e): Significant differences in evoked ITPC between*  
 313 *mismatched and matched cue conditions (multiple comparisons corrected using a*  
 314 *cluster-based criterion; Methods). b, f): Evoked ITPC spectra at significant regions*  
 315 *in (a) and (e). The magenta and blue lines and their shading show mean  $\pm 1$  standard*  
 316 *error of the mean across 34 subjects for mismatched and matched cues, respectively.*  
 317 *Solid vertical black lines mark in (b) the behaviorally observed attentional sampling*  
 318 *frequency at 3.5 Hz, and in (f) the 8 Hz sampling frequency observed behaviorally. (c,*  
 319 *d): Stronger 3.5 Hz nITPC correlates with increased PSI during (c) mismatched and*



320 *(d) matched conditions. The x and y-axes represent the normalized ITPC and*  
321 *perceptual switch index respectively (see text for definitions). (g, h): Stronger 8 Hz*  
322 *nITPC correlates with a decreased PSI for (h) matched, but not the (g) mismatched*  
323 *condition.*

## 324 **Discussion**

325           Our findings provide novel evidence that attentional sampling exists during  
326 binocular rivalry, demonstrated in both behavior and the electroencephalogram  
327 (EEG). Behaviorally, we replicated previous evidence that crossmodal cues can cause  
328 a switch to previously suppressed visual stimuli when mismatched with the current  
329 percept (to bring about crossmodal congruence), as well as increase the maintenance  
330 of a dominant visual image if cues matched perception (Figure 1; Lunghi & Alais,  
331 2015; Lunghi, Morrone, & Alais, 2014). Critically, we found distinct attentional  
332 sampling frequencies evident in the time-course of first switches during these cues  
333 (Figure 2). When crossmodal cues were incongruent in temporal frequency with the  
334 dominant visual stimulus, switches in visual consciousness occurred earlier, and  
335 within a distinct ~3.5 Hz rhythm. This 3.5 Hz rhythm is consistent with previous  
336 reports of divided attentional sampling between two locations (Fiebelkorn et al., 2013;  
337 Landau & Fries, 2012; Landau et al., 2015). However, when crossmodal cues were  
338 matched in temporal frequency to the dominant visual stimulus, changes in visual  
339 consciousness demonstrated an ~8 Hz rhythm, consistent with periodicities in  
340 behavioral measures observed when attending to a single visual location (Dugué et  
341 al., 2015; Fiebelkorn et al., 2013). In the EEG (Figure 3), distinct correlates of these  
342 divided and focused attentional sampling frequencies emerged over fronto-temporal  
343 and parieto-occipital sites, respectively, with ITPC strength at these frequencies  
344 correlating with the behaviorally reported change in consciousness across subjects.

345 Traditionally, top-down, voluntary attention has been thought to have limited  
346 control over perceptual dynamics during binocular rivalry (Paffen & Alais, 2011; for  
347 bottom-up control, including crossmodal stimulation, see Conrad, Bartels, Kleiner, &  
348 Noppeney, 2010; Deroy et al., 2016; Guzman-Martinez, Ortega, Grabowecky,  
349 Mossbridge, & Suzuki, 2012; Kang & Blake, 2005; Lunghi & Alais, 2013; Lunghi,  
350 Binda, & Morrone, 2010; Lunghi et al., 2014; van Ee, van Boxtel, Parker, & Alais,  
351 2009). Our results clearly show additional dependence on the top-down deployment  
352 of attention, as without explicit instruction to attend to crossmodal signals, no  
353 facilitatory crossmodal effects emerged (see also Jack & Hacker, 2014; Talsma,  
354 Senkowski, Soto-Faraco, & Woldorff, 2010; van Ee et al., 2009). This interaction  
355 between low-level stimulus features (temporal frequency) and the allocation of  
356 attention indicates the facilitative role of both crossmodal stimuli (Deroy et al., 2016;  
357 Deroy, Chen, & Spence, 2014) and attention for perceptual transitions during  
358 binocular rivalry (Kevin C. Dieter, Brascamp, Tadin, & Blake, 2016; Kevin Conrad  
359 Dieter & Tadin, 2011; Paffen & Alais, 2011; P. Zhang, Jamison, Engel, He, & He,  
360 2011), here revealing a previously unknown periodicity to changes in visual  
361 perception.

362 Previous investigations of attentional sampling have relied upon a brief cue to  
363 reorient attention, before estimating the time-course of target detection by densely  
364 sampling subject responses over closely spaced target-presentation intervals. Our  
365 design is unique in that ‘target-detection’ here is operationalized as the first reported  
366 change in visual consciousness for a continuously presented stimulus, resolved at 16.7  
367 ms (or 60 Hz) from 500 ms to 2000 ms following cue-onset.

368 Past research has demonstrated approximately 7-8 Hz fluctuations in  
369 perceptual performance following the allocation of visual attention to a single location

370 (Laura Dugué et al., 2015; Fiebelkorn et al., 2013; R. VanRullen et al., 2007; Zoefel  
371 & VanRullen, 2017), commensurate with suggestions that cortical oscillations at  
372 approximately 7-8 Hz gate the content of visual perception (Busch & VanRullen,  
373 2010; Hanslmayr, Volberg, Wimber, Dalal, & Greenlee, 2013). In our binocular  
374 rivalry paradigm, we also observed changes in visual consciousness occurring within  
375 an 8 Hz rhythm, yet unique to when cues were congruent with the dominant visual  
376 stimulus at cue onset. By contrast, perceptual sampling has previously been observed  
377 at ~4 Hz when cues have encouraged dividing attention between two objects or  
378 locations (Fiebelkorn et al., 2013; Huang et al., 2015; Landau & Fries, 2012; Landau  
379 et al., 2015; Song, Meng, Chen, Zhou, & Luo, 2014). As such, the ~3.5 Hz rhythm we  
380 observed when crossmodal cues mismatched with the conscious visual stimulus  
381 extends the evidence for divided attentional sampling to binocular rivalry.

382         We note that the issue of trial-to-trial variability when reporting on perceptual  
383 changes cannot be completely avoided in binocular rivalry research, and is important  
384 to consider. Here one might argue that variable timing in perceptual reports may blur  
385 any effects of temporal periodicity. However, our results clearly demonstrate that  
386 robust periodic cycling of perceptual states occur, despite the inherent variability in  
387 response times.

388         Distinct neural correlates of these attentional sampling rhythms were also  
389 found in the EEG. We found significantly greater 3.5 Hz ITPC strength for  
390 mismatched compared to matched cue types over right fronto-centro-temporal  
391 electrodes [FT8 and C6], suggesting this region may be a candidate neural correlate  
392 for divided periodic attentional sampling (Figure 3a). Accordingly, following both  
393 mismatched and matched cues, increased 3.5 Hz ITPC in this region also positively  
394 correlated with the likelihood of switching to the previously suppressed visual image

395 across subjects (Figure 3c-d). Using visual-only stimulation, previous research has  
396 identified a pre-target ~4 Hz phase-dependency for peri-threshold perception when  
397 attention is divided across visual hemifields (Landau et al., 2015). We note that in our  
398 paradigm, attention was not divided between visual hemifields, yet interestingly, our  
399 right fronto-temporal region has previously been implicated in the reorientation of  
400 attention to unattended locations (Corbetta & Shulman, 2002; Downar, Crawley,  
401 Mikulis, & Davis, 2000; Proskovec, Heinrichs-Graham, Wiesman, McDermott, &  
402 Wilson, 2018). Taken together, our results show that periodic attentional sampling  
403 exists during binocular rivalry, when visual stimuli spatially overlap and compete for  
404 perceptual dominance.

405 We also found behavioral and neural correlates of focused attentional  
406 sampling during binocular rivalry when cues were consistent with the prevailing  
407 visual percept. Specifically, 8 Hz ITPC over parieto-occipital electrodes was  
408 negatively correlated with the likelihood of switching to the incongruent perceptual  
409 outcome (Figure 3e, h). Previously, phase-dependent peri-threshold perception has  
410 been reported for focused attention tasks in the visual domain (Busch & VanRullen,  
411 2010; Busch et al., 2009; Hanslmayr et al., 2013; Mathewson et al., 2009), and has  
412 primarily implicated an approximately 7 Hz component located over fronto-central  
413 electrodes (Busch & VanRullen, 2010; Busch et al., 2009). Given the differences  
414 between paradigms, it is unsurprising that our identified region for focused attentional  
415 sampling does not coincide with those reported in previous research regarding phase-  
416 dependent perception. Nonetheless, it is notable that we identified right fronto-centro-  
417 temporal [FT8, C6] and right parieto-occipital [P6, PO8] regions in the EEG. Activity  
418 over each of these regions has previously been implicated in the reorienting of visuo-  
419 spatial attention (Corbetta & Shulman, 2002; Downar et al., 2000; Laura Dugué,

420 Merriam, Heeger, & Carrasco, 2017; Proskovec et al., 2018), and for the integration  
421 of multisensory stimuli into a coherent percept (Beauchamp, 2005; Bushara et al.,  
422 2003; Calvert & Thesen, 2004; Driver & Noesselt, 2008; D. Zhang, Hong, Gao, Gao,  
423 & Röder, 2011). Increases in right parieto-occipital theta power (4-8 Hz) have also  
424 been shown when attending to visual stimuli in the presence of auditory distractors  
425 (van Driel, Knapen, van Es, & Cohen, 2014), with the phase of right parieto-occipital  
426 alpha (8-10 Hz) or theta (6-7 Hz) oscillations determining the perceptual outcome of  
427 bistable stimuli (Ronconi, Oosterhof, Bonmassar, & Melcher, 2017). As such, the  
428 present modulation for 8 Hz parieto-occipital ITPC is consistent with the idea that  
429 right-parietal networks may preferentially represent temporal information in the visual  
430 modality (Battelli, Pascual-Leone, & Cavanagh, 2007; Guggisberg, Dalal, Schnider,  
431 & Nagarajan, 2011). While promising, our right-lateralized response may also be due  
432 to the left-lateralized tactile input. Future experiments that control for this aspect can  
433 address this issue

434           Our analysis so far has revealed that when crossmodal cues mismatched the  
435 dominant binocular rivalry stimulus, that rates of attentional sampling slowed to ~ 3.5  
436 Hz – implicating the division of attention over multiple locations. However, our  
437 exogenous cues oriented attention toward the congruency of visual and crossmodal  
438 stimuli, prompting the question: between what was attentional sampling divided? One  
439 possibility is that attentional sampling during mismatched cues was divided between  
440 two sensory modalities, as the brain tried to resolve a conflict between concurrent  
441 auditory/tactile and visual information. Figure 4a provides a schematic of this  
442 multisensory interpretation. If the neural activity in our identified region is  
443 representative of divided sampling between modalities, it constitutes the first evidence  
444 that an attentional sampling mechanism can flexibly orient between temporally co-

445 modulating crossmodal stimuli. Although the facilitative role of attention in  
446 multisensory integration remains controversial (Hartcher-O'Brien et al., 2016; Talsma  
447 et al., 2010), we see it as a viable possibility that this mechanism resolved perceptual  
448 ambiguity through a visual perceptual switch to the competing image, rendering the  
449 multisensory stimuli congruent.

450       Crossmodal attentional sampling may also explain why we observed low- but  
451 not high-frequency behavioral effects in the present task, particularly in the context of  
452 previous investigations regarding the binding of multisensory stimulus attributes  
453 (Fujisaki & Nishida, 2005, 2010; Lunghi et al., 2014; Vroomen & Keetels, 2010), and  
454 the limits of crossmodal temporal judgments (Fujisaki & Nishida, 2005, 2010;  
455 Holcombe, 2009; Vroomen & Keetels, 2010). For example, Fujisaki and Nishida  
456 (2005) have shown that judgments of temporal synchrony between rhythmic sensory  
457 streams degrade above ~4 Hz. It is plausible that the ineffective crossmodal cueing  
458 that we found is related to the above mentioned findings.

459       Having said that, one previous study using a similar design to ours was  
460 successful in eliciting a high-frequency crossmodal effect (15-20 Hz; Lunghi et al.,  
461 2014). We believe these differences are not wholly unexpected, as to optimize the  
462 present task for EEG recordings we used larger (6.5° visual angle) luminance-  
463 modulated sinusoidal gratings to facilitate subsequent steady-state visually evoked  
464 potential analyses (Davidson et al., in prep). While in comparison, Lunghi et al  
465 succeeded in showing a high-frequency effect with rivalry stimuli that were contrast-  
466 modulated narrow-band random noise patterns (3.2° visual angle), and did so under  
467 conditions analogous to our non-attend conditions. This difference in the composition  
468 of visual stimuli is noteworthy, as stimulus size is known to strongly affect rivalry  
469 dynamics (Blake, O'Shea, & Mueller, 1992). To our knowledge, whether stimulus

470 size impacts upon crossmodal effects during binocular rivalry is unknown. However  
471 given the strength of our results for attended low-frequency flicker (Figure 1b), we  
472 note that the low- and high-frequency effects observed by Lunghi et al (2014) are not  
473 generalizable to the rivalry stimuli employed here. Similarly, whether the type of  
474 stimuli (e.g., gratings vs random noise patterns) also impacts upon crossmodal effects  
475 during rivalry represents a fruitful endeavor for research, particularly given the novel  
476 possibility of crossmodal attentional sampling.

477  
478 An alternate possibility to crossmodal attentional sampling is that the 3.5 Hz  
479 rhythm in our paradigm reflects divided attentional sampling between dominant and  
480 suppressed visual images during binocular rivalry (Figure 4b). The frequency of  
481 divided attentional sampling that we observed is consistent with those obtained when  
482 visual attention has been divided between two objects or locations (Fiebelkorn et al.,  
483 2013; Landau & Fries, 2012). As our binocular rivalry stimuli necessarily occupied  
484 the same spatial location, attention in our paradigm was likely divided between either  
485 features or objects, instead of locations. Indeed, feature-based attention has already  
486 been shown to modulate neural processes when an attended target is suppressed  
487 during continuous flash suppression (Kanai, Tsuchiya, & Verstraten, 2006). During  
488 binocular rivalry, perceptual dominance is also influenced by object-based attention  
489 (Mitchell, Stoner, & Reynolds, 2004), with unconscious selection mechanisms argued  
490 to mediate perceptual transitions (Lin & He, 2009). This second alternative is also  
491 indirectly supported by the temporal limits of binocular rivalry when conflicting  
492 visual stimuli are presented asynchronously, without temporal overlap between the  
493 two eyes (O'Shea & Blake, 1986; van Boxtel, Knapen, Erkelens, & van Ee, 2008; J.  
494 van Boxtel, van Ee, & Erkelens, 2007). The maximum stimulus onset asynchrony that  
495 can sustain this type of rivalry is approximately  $350 \pm 50$  ms, beyond which

496 alternating stimuli introduced to one eye are perceived immediately, without rivalry  
497 occurring (van Boxtel, Alais, Erkelens, & van Ee, 2008). This limit is consistent with  
498 a 7-8 Hz attentional sampling rhythm distributed between the two conflicting stimuli  
499 (each sampled at ~3-4 Hz). When stimuli are presented rapidly enough they are  
500 temporally bound together and can engage in ongoing rivalry; when stimuli are  
501 presented slower than at 3-4 Hz, they are temporally individuated by attention, and  
502 rivalry ceases.

503         The suggestion that attention can sample between conscious and nonconscious  
504 vision is also consistent with a view that the underlying neuronal processes for  
505 attention and consciousness are supported by distinct neural mechanisms (Bahrami,  
506 Lavie, & Rees, 2007; Watanabe et al., 2011; for review see Tsuchiya & Koch, 2015).  
507 We note that while attentional sampling of a suppressed image suggests that attention  
508 is not sufficient for consciousness (Dehaene, Changeux, Naccache, Sackur, &  
509 Sergent, 2006; Koch & Tsuchiya, 2007; Lamme, 2003; van Boxtel, Tsuchiya, &  
510 Koch, 2010), this interpretation remains consistent with a view that attention may still  
511 be necessary for conscious perception (Chica & Bartolomeo, 2012; Cohen & Dennett,  
512 2011; Merikle & Joordens, 1997; O'Regan & Noë, 2001; Posner, 1994, 2012).

513         Whether attributable to conscious-nonconscious, or visual-crossmodal  
514 attentional sampling, the present results also complement the 'active-sensing'  
515 hypothesis (Schroeder, Wilson, Radman, Scharfman, & Lakatos, 2010), whereby  
516 perceptual selection is determined by routine exploratory behaviors. Within active-  
517 sensing attention is critical to 'search for' task-relevant information from the  
518 environment (Schroeder et al., 2010), particularly via the rhythmic coordination of  
519 multisensory information (Schroeder et al., 2010; Thorne & Debener, 2014).  
520 Intriguingly, early contributions from multi-sensory (non-visual) information have



521 been shown to determine perception (Morillon, Schroeder, & Wyart, 2015; Schroeder  
522 et al., 2010; van Atteveldt et al., 2014). While the rhythmic modulation of visual  
523 performance has also been demonstrated to follow the onset of both voluntary  
524 (Hogendoorn, 2016), and preparatory motor behaviors (Tomassini, Spinelli, Jacono,  
525 Sandini, & Morrone, 2015; Tomassini, Ambrogioni, Medendorp, & Maris, 2017).  
526 Here, in further support of the active sensing hypothesis, we have shown that task-  
527 relevant multi-sensory information can change the rhythmic modulations of  
528 perceptual selection during competition for perceptual dominance.

529           In summary, here we have provided novel evidence in support of attentional  
530 sampling during binocular rivalry, through the use of crossmodal cues matched to  
531 either a conscious or nonconscious visual stimulus. As the attention sampling  
532 hypothesis continues to garner traction from various psychophysical and neuronal  
533 paradigms (VanRullen, 2016a, 2016b), future targeted experimentation can confirm  
534 whether attention can indeed sample across modalities (Figure 4a), as well as if  
535 attention can sample between conscious and nonconscious neural representations  
536 during binocular rivalry (Figure 4b). The interactions between crossmodal stimuli and  
537 conscious perception represent a fruitful avenue for experimentation (Faivre, Arzi,  
538 Lunghi, & Salomon, 2017), here uncovering the previously unknown dependence of  
539 attention and consciousness on rhythmic neural dynamics of the human brain.  
540

a) Crossmodal Sampling Hypothesis:

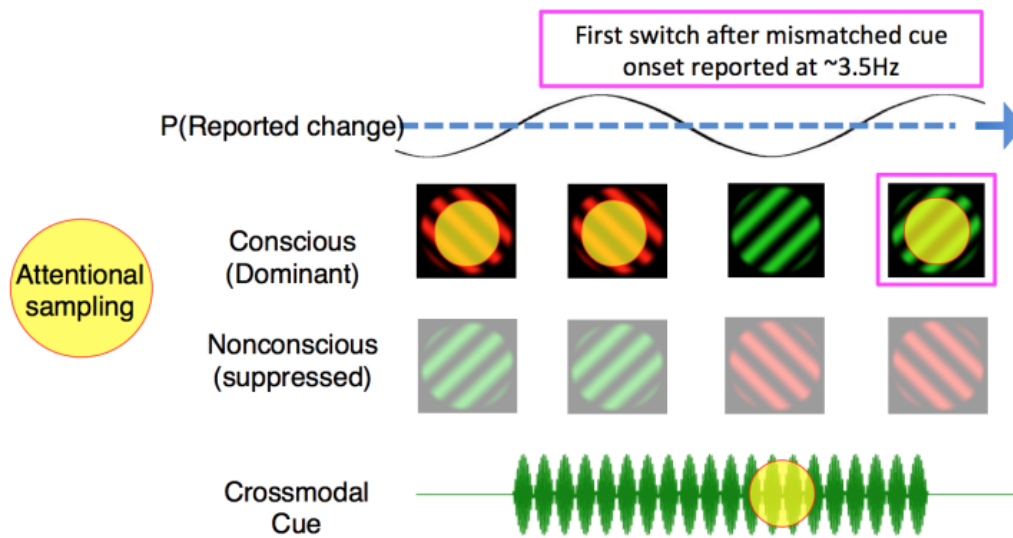

b) Conscious-nonconscious Sampling Hypothesis:

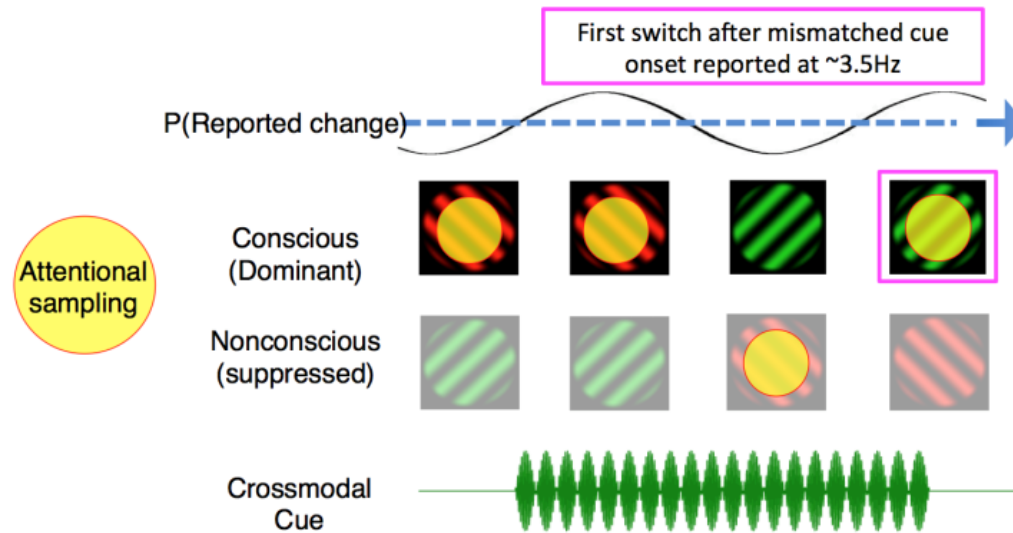

541

542 *Figure 4. Two possible interpretations of attentional sampling during mismatched*  
543 *crossmodal cues. Schematic representation of attentional sampling and perceptual*  
544 *oscillations during binocular rivalry. a) Crossmodal sampling hypothesis: While*  
545 *perceiving the high-frequency visual flicker, an attended low-frequency crossmodal*  
546 *cue mobilises attention to sample between the dominant image and mismatched*  
547 *crossmodal cue at ~3.5 Hz. As a consequence, the likelihood of the first perceptual*  
548 *switch is modulated at ~3.5 Hz. b) Conscious-nonconscious sampling hypothesis:*  
549 *The onset of a mismatched cue prompts attention to sample between separate visual*  
550 *features, which in our paradigm consists of dominant and suppressed visual images.*  
551

552

553 **Methods**

554 **Participants**

555 Thirty-four healthy individuals (21 female, 1 left handed, average age  $23 \pm 4.7$ ) were  
556 recruited via convenience sampling at Monash University, Melbourne, Australia. All  
557 had normal or corrected-to-normal vision and gave written informed consent prior to  
558 participation. Monash University Human Research and Ethics Committee approved  
559 this study, and subjects were paid 15 AUD per hour of their time, over an  
560 approximate total of 5 hours.

561

562 **Apparatus and Stimuli**

563 Stimuli were generated using Psychtoolbox (Brainard, 1997) and custom MATLAB  
564 scripts. Each visual stimulus was viewed through a mirror stereoscope placed at an  
565 approximate viewing distance of 55 cm from computer screen (29 x 51 cm, 1080 x  
566 1920 pixels, 60 Hz refresh rate) with the subject's head stabilized via chin rest.  
567 Rivalry stimuli were red and green gratings displayed on a black background, with a  
568 white frame to aid binocular fusion, embedded within the wider gray background of  
569 the remaining portions of the screen. Beside each white framed image, colored arrows  
570 indicated the direction for button press (e.g., right for red, left for green). Gratings  
571 were sinusoidal with spatial frequency of 0.62 cycles per degree, oriented  $\pm 45^\circ$  from  
572 vertical, and subtended  $6.5^\circ$  visual angle (240 x 240 pixels on the display). Visual  
573 stimuli were contrast-modulated at either 4.5 or 20 Hz using a temporal sinusoidal  
574 envelope. The phase of each grating was static throughout each 3-minute binocular  
575 rivalry block, yet shifted after each block to reduce the effects of visual adaptation.  
576

577 For crossmodal stimuli 50 Hz carrier tones were amplitude modulated by 4.5 or 20 Hz  
578 sine waves to create digital waveforms, which were either 2, 3.1 or 4 seconds in  
579 duration. For tactile stimulation, subjects clasped a wooden ball with their left hand  
580 attached to a Clark Synthesis Tactile Sound Transducer (TST429 platinum) housed in  
581 a custom sound insulated box (Lunghi et al., 2014). Auditory stimulation was  
582 delivered binaurally through Etymotic HD5 noise reduction headphones, with ACCU-  
583 Fit foam ear tips to reduce ambient noise.

584

### 585 **Stimulus timing**

586 Accurate stimulus timing of synchronous visual and crossmodal stimuli was ensured  
587 with a WDM-compatible, hardware-independent, low-latency ASIO driver  
588 ([www.asio4all.com](http://www.asio4all.com)), which was necessary to minimize audio buffer duration to sub-  
589 millisecond intervals and reduce latency compensation. The time-course of stimulus  
590 presentation was also physically recorded in the EEG for offline analysis.

591 Photodiodes were used to record the flicker-envelope of visual stimuli and stored as  
592 separate channels in the ongoing EEG. The waveforms for crossmodal stimulation  
593 were simultaneously sent to both the presentation hardware and external electrode  
594 channels using a digital splitter (Redback A2630 4 Channel Headphone Distribution  
595 Amplifier). Stimulus presentation lag was assessed by computing the difference  
596 between the recorded frames of trigger-codes and actual physical trace within the  
597 EEG as part of data pre-processing. We adjusted the relative timing of behavioral and  
598 EEG data accordingly as part of this analysis. In most cases, no adjustment was  
599 necessary, requiring a maximum change of 3 frames in duration on <1% of blocks  
600 across all subjects.

601

602 **Calibration of visual stimuli**

603 A maximum of 10 one-minute binocular rivalry blocks were performed prior to  
604 experimentation on the first day for all subjects. These blocks served to familiarize  
605 subjects with reporting their visual percepts during binocular rivalry, and to calibrate  
606 approximately equal dominance durations for the flickering stimuli in each eye. By  
607 this procedure, we instructed subjects to minimize the report of mixed rivalry and to  
608 adopt a constant criterion for perceptual report throughout the experiment (Figure S6).  
609 Contrast values for left/right eye, green/red color, and low/high frequency stimulus  
610 combinations (in total, 8 combinations) were adjusted on a logarithmic scale until  
611 approximately equivalent total dominance durations were reached (between 1:1 and  
612 1:1.5), with the additional requirement that the average perceptual duration for each  
613 stimulus was longer than 1 second. As there were 24 unique 3-minute binocular  
614 rivalry blocks on each day of experimentation, each of the 8 combinations of visual  
615 parameters was balanced across all three crossmodal conditions.

616

617 **Calibration of auditory stimuli**

618 Prior to experimentation, subjects were also tasked with equating the perceptual  
619 intensity of tactile and auditory stimulation for each low- and high-frequency  
620 condition, to achieve approximately equal phenomenological intensity across subjects  
621 and stimulus conditions. For all subjects, the amplitude of tactile vibrations was set to  
622 the same comfortable, supra-threshold level (approximately equivalent to 65 dB SPL).  
623 In the absence of visual stimulation, simultaneous auditory and tactile stimuli were  
624 then presented in a staircase procedure, with subjects adjusting the amplitude of  
625 auditory tones to match the perceived intensity of simultaneous tactile vibrations.  
626 They performed the matching task separately within low-frequency auditory tones

627 and tactile vibrations and within high-frequency auditory tones and tactile vibrations.

628 This calibration procedure was performed on each day of testing, to account for

629 differences in the insertion depth of inner-ear headphones across separate days.

630

### 631 **Experimental Procedure and Behavioral Analysis**

632 Twentyfour three-minute binocular rivalry blocks were presented on each of the two

633 separate days of testing. In each block, subjects reported their dominant visual percept

634 during rivalry while receiving occasional crossmodal cues, which were either

635 auditory, tactile, or simultaneous auditory and tactile. In a given three-minute block,

636 we presented only one of the three types of crossmodal cues. The order of these

637 blocks were randomized for each subject and each day of experimentation. In each

638 block, 12 trials of crossmodal cues were presented. Each cue was either low (4.5 Hz)

639 or high (20 Hz) frequency auditory and/or tactile stimulation. Six cues were presented

640 for each frequency, with durations composed of three x 2 s, two x 3.1 s, and one x 4 s

641 cues. To increase uncertainty of the timing of the cues, we inserted three null cues

642 (which we call visual-only periods, Figure 1) without any crossmodal stimulation for

643 a duration of 2.6 s (the average of crossmodal cue durations). We also used these

644 visual-only periods as baseline for behavioral analysis (Figure 1 and 2). We

645 randomized the order of all cues, which were separated with uniform jittering by 7-10

646 s ISI within each block.

647

648 Across all sessions, subjects were told to focus on accurately reporting their dominant

649 visual percept at all times via button press. As the state of the button-press was

650 sampled at 60 Hz, the same rate as the video refresh rate, we were able to estimate the

651 probability and time-course of binocular rivalry dynamics over 16.7 ms intervals.

652  
653 Over two sessions on separate days, subjects distributed attention between visual  
654 rivalry and crossmodal cues based on separate task instructions. On Day 1 for  $n=18$   
655 or Day 2 for  $n=16$ , subjects were instructed to ignore the crossmodal cues and to  
656 focus on reporting only visual rivalry. For the other session, subjects were instructed  
657 to distribute attention across both visual rivalry and crossmodal cues. To ensure their  
658 attention was on task, these alternate days included task instructions for subjects to  
659 silently tally the number of times the temporal frequency of an attended crossmodal  
660 cue matched that of their dominant visual percept at the time of crossmodal cue's  
661 offset. Due to the varied duration of crossmodal cues, this task ensured that attention  
662 was allocated consistently throughout the presentation of crossmodal cues. To  
663 familiarize subjects with these task demands, an additional two practice blocks (three  
664 minutes each) were included during the calibration procedure on the relevant day of  
665 experimentation. Although 34 subjects were retained for final analysis, five others  
666 were recruited and began the experiment, yet failed to complete their second day of  
667 experimentation. One other subject was removed due to their failure in following task  
668 instructions and excessive movement during EEG recording.

669  
670 **Evaluation of attention-on-task**

671 To evaluate the attentional allocation to both visual and crossmodal stimuli, at the end  
672 of each 3-minute block we asked subjects to verbally report their subjective estimate  
673 of the number of crossmodal stimuli which were matched in temporal frequency to  
674 the flicker of their dominant visual percept at the point of attended-crossmodal cue  
675 offset. Then, we defined an index, 'attention to cues' (Figure 1c, x-axis) as the  
676 correlation coefficient between 24 subjective estimates (one per attended block) and  
677 the actual recorded occurrences of congruent stimuli. Supplementary Figure S7

678 displays the correlation between subjective and actual congruent stimuli for an  
679 exemplary subject.

680  
681 **Behavioral data analysis**

682 We preprocessed the button press data to accurately estimate the timing of changes in  
683 visual consciousness during binocular rivalry. First, we categorised each time-point  
684 according to the flicker frequency of the dominant visual stimulus reported. To  
685 analyze the time-course of the probability of a button press state (Figure 1b), we  
686 categorized button-presses (which could be either low or high-flicker) as either  
687 congruent or incongruent with the ongoing crossmodal stimulus frequency. Then, we  
688 obtained the probability of a congruent button press state as a function of time per  
689 subject, by averaging responses at each time point across all 144 trials per attention x  
690 frequency cue subtype. For visual-only periods, the left button (corresponding to left-  
691 eye dominance) was arbitrarily set to congruent prior to the averaging of probability  
692 traces within subjects. As visual parameters were balanced across all blocks, this  
693 selection necessarily balanced across visual frequency and colour parameters, and we  
694 note that the identical analysis performed using right-eye congruence produced  
695 equivalent results. Mismatched (Figure 1d) or matched (Figure 1e) condition  
696 comparisons were then defined by whether the congruent button (left-eye dominant)  
697 was pressed at cue onset. In these two panels, we set the y-axis for ‘Probability of  
698 seeing mismatched flicker’, to reflect the probability of perceptual states that differ in  
699 temporal frequency from the crossmodal cue. In Figure 1b, d, and e, we compared  
700 among conditions (visual-only, low-frequency or high-frequency crossmodal cue x  
701 attended vs unattended conditions) with one-way repeated-measures ANOVAs. We  
702 defined significant differences among conditions at those time points that survived



703 corrections for multiple comparisons with planned comparisons between cue types  
704 and the visual-only baseline, using FDR at  $q = .05$  (Benjamini & Yekutieli, 2001).

705

### 706 **Perceptual Switch Index (PSI)**

707 To quantify crossmodal effects during binocular rivalry, we defined the perceptual  
708 switch index (PSI). PSI is the difference in the probability of a change in percept  
709 when comparing attended low-frequency to all other crossmodal cues. For the y-axis  
710 in Figure 1c, we calculated the PSI as the difference in the probability of viewing a  
711 congruent visual flicker over the period 1-4 s after stimulus onset. The same  
712 subtraction was used to compare the probability of viewing the previously suppressed  
713 visual flicker following mismatched (Figure 3c, g) and matched cues (Figure 3d, h),  
714 for the period 2-4 s after onset. This shorter time window was selected to capture  
715 when the crossmodal effects on binocular rivalry emerged for mismatched and  
716 matched cues. A similar pattern to the results displayed in Figure 3 was shown when a  
717 wider window was used (e.g. 0-4 s, data not shown).

718

### 719 **Spectral analysis of first switches**

720 For our spectral analysis (Figure 2), we focused on the first perceptual switches,  
721 which were the first time-point recording a change in button-press state after cue  
722 onset. To account for individual variation in the amount of overall switches, the  
723 proportion of switches at each time point was first calculated at the subject level,  
724 before averaging across all subjects. We sampled button presses at 60 Hz (or every  
725 16.7 ms). For the spectral analysis of perceptual switches (Figure 2f), we applied a  
726 single-taper fast Fourier transform (FFT) to the period 0.5 - 2 seconds after cue onset  
727 (Nyquist = 30 Hz, a half bandwidth = 0.67 Hz). This window was selected to restrict  
728 the analysis so that all the analyzed trials occurred during an attended cueing period

729 (as the minimum crossmodal cue duration was 2 seconds), and to remove transient  
730 button presses occurring early in the cue period, which were unlikely to be caused by  
731 crossmodal match or mismatch (Figure S2). We display the frequency range of 0 - 15  
732 Hz for all conditions, as no higher frequencies (15-30 Hz) were significant after our  
733 two-stage statistical criteria.

734

### 735 **Statistics on spectra of first switch timing**

736 To assess the statistical significance of behavioral spectra we used a two-stage  
737 statistical testing procedure as applied in previous investigations of attentional  
738 sampling (Landau & Fries, 2012) and electrophysiological research (Maris &  
739 Oostenveld, 2007). At the first stage, we first detected significant frequencies (at  $p <$   
740  $.005$  uncorrected) through a non-parametric randomization procedure. After obtaining  
741 the spectral amplitude for the observed data across subjects, we generated a null  
742 distribution of first switches during the same cue period by randomly shifting switch-  
743 times within each subject, while keeping the number of perceptual switches the same.  
744 We generated 5000 surrogate datasets in this way, to test the null hypothesis that there  
745 were no temporal effects on the timing of perceptual switches. We then compared the  
746 amplitude of the Fourier transform from the observed and the surrogate data at each  
747 frequency. We regarded the spectral amplitude at a certain frequency to be  
748 significantly above chance, if the observed spectral amplitude exceeded the top 99.5%  
749 of the null-distribution of amplitudes at each frequency generated by surrogate data.

750 At the second stage, we applied a cluster criterion, which corrects for multiple  
751 comparisons across multiple frequencies through a permutation procedure (Maris &  
752 Oostenveld 2007). We required that the first-level significance ( $p < .005$  uncorrected)  
753 be sustained for at least two neighboring frequencies, and retained the sum of their  
754 clustered test-statistics (amplitudes in this case) as our observed data. Then, from our

755 surrogate dataset, we calculated the maximum cluster-based amplitudes per surrogate  
756 (maximum spectral amplitude excluding 0-1 Hz and nearest neighbor), which we  
757 retained as the null-distribution to compare against our observed data. Candidate  
758 clusters survived this second order analysis when their observed cluster-based test-  
759 statistics exceeded the top 95% of the null distribution, or corrected to  $p_{cluster} < .05$  if  
760 testing across multiple clusters. The null-distributions obtained for our frequencies of  
761 interest in Figure 2f are shown in Figure S3.

762

### 763 **EEG recording and analysis**

764 EEG was recorded at a sampling rate of 1000 Hz using three BrainAmp amplifiers  
765 and 64-channel ActiCap (BrainProducts), with the impedance of each electrode kept  
766 below 10 k $\Omega$ . Ground and reference electrodes were AFz and FCz at recording,  
767 respectively. After re-referencing the data to the average of all channels, we  
768 performed linear detrending and bandpass filtering (0.1- 60 Hz with a Hamming-  
769 windowed finite impulse response filter) and down-sampled the data to 250 Hz before  
770 time-frequency analysis.

771 We performed all time-frequency analyses using the Chronux toolbox  
772 (<http://chronux.org>; Bokil, Andrews, Kulkarni, Mehta, & Mitra, 2010) and custom  
773 MATLAB scripts. To resolve our frequencies of interest (especially between 3.5 and  
774 4.5 Hz), we used a single-taper Fourier transform with a time-window of 2 seconds,  
775 which resulted in a half bandwidth ( $W$ ) of 0.5 Hz ( $W = 1/2$ ). This half bandwidth is  
776 consequently capable of resolving differences between 3.5 and 4.5 Hz, as  
777 demonstrated in Figure 3b and f.

778

### 779 **ITPC analysis**

780 To assess the neural correlates of attentional sampling (Figure 3), we analyzed  
781 the inter-trial phase coherence (ITPC) within electrodes, over multiple time-frequency  
782 points (Bastos & Schoffelen, 2016). ITPC is an amplitude-normalized measure of the  
783 degree to which EEG responses are phase locked to the onset of an exogenous cue,  
784 ranging between 0 (random phase over trials) and 1 (perfect phase coherence over  
785 trials). To compute ITPC, the consistency of phase angles is computed as the length  
786 of the average of unit phase vectors in the complex plane over trials. For a given time,  
787  $t$ , and frequency,  $f$ ,

$$\text{ITPC}(t,f) = \left| \frac{1}{N} * \sum_{n=1}^N e^{i(\theta(t,f,n))} \right|$$

788  
789 where  $N$  is the number of trials, and  $\theta$  is the phase angle at time  $t$ , frequency  $f$ , and  
790 trial  $n$ .

791 Due to the stochastic nature of perceptual alternations during binocular rivalry,  
792 the number of available trials for analysis in each mismatched and matched cue type  
793 ranged from 12 to 36 trials across subjects (after averaging first across subjects, the  
794 mean number of trials was 24 ( $\pm 1.5$ ) trials across matched / mismatched and attention  
795 conditions). Because the bias level (or expected chance level for pure noise data) of  
796 ITPC is strongly influenced by the number of trials, we took additional measures to  
797 equate the number of mismatched and matched cue types for the analysis. To achieve  
798 this aim, the maximum number of trials recorded for a given cue combination was  
799 identified across subjects. Following this, subjects with fewer numbers of trials had  
800 their observed number of trials supplemented by resampling with replacement from  
801 their recorded trials, equating them to the predefined maximum for each condition.  
802 Upon this resampled dataset, the ITPC was computed, and this process repeated 100

803 times. Our analysis confirmed that upsampling, compared to downsampling, reduced  
804 the bias introduced when equating ITPC values across subjects. As the difference in  
805 ITPC between auditory, tactile, and combined auditory and tactile cues was not  
806 significant, we proceeded by combining crossmodal cue types within each subject.

807

### 808 **ITPC statistics**

809 To investigate the neural correlates of attentional sampling, we analysed  
810 evoked ITPC, the increase in ITPC during 0 to 2 s after onset compared to -2 to 0 s  
811 before onset. Similar to our statistical approach for the behavioral spectral analysis  
812 described above, we used a two-stage statistical testing procedure for this analysis. At  
813 the first stage, we performed a *t*-test (two-tailed) comparing whether evoked 3.5 and 8  
814 Hz ITPC differed between mismatched and matched conditions across subjects at  
815 each electrode. At each electrode, we used the mean evoked ITPC value obtained  
816 from the upsampling method described above. As a result of the *t*-tests, if we found a  
817 cluster of at least two neighboring electrodes with  $p < .05$  (uncorrected), where inter-  
818 electrode distance did not exceed 3.5 cm, we proceeded using this cluster in the  
819 second stage of statistics. As a result of this cluster criterion, we always identified a  
820 minimum size of 2-electrode clusters (Figure 3a and e).

821 At the second stage, we first computed the sum of observed *t*-scores within the  
822 identified cluster, which we retained as our observed test-statistic (Figure S5). To  
823 create the null distribution, condition labels (mismatch and match) were randomly  
824 shuffled for each electrode within each subject, to create two surrogate datasets the  
825 same size as our original mismatch and match conditions. Then the *t*-scores were  
826 computed for each electrode based on our surrogate datasets, and the electrode with  
827 the maximum *t*-score and the maximum *t*-score of its neighbors retained. The sum of  
828 these *t*-scores were then retained per shuffle, and this procedure repeated 2000 times

829 to obtain a null distribution of the sum of  $t$ -scores around the maximum electrode for  
830 each shuffle of our surrogate data. Against this distribution, the sum of observed  $t$ -  
831 scores for the candidate cluster was then compared. When the observed sum of  $t$ -  
832 scores was within the top 5% (or cluster corrected to  $p < .05$ ) then we concluded that  
833 there was a significant difference between mismatch and match conditions. The null-  
834 distributions and observed test-statistics produced by this analysis are shown in Figure  
835 S5.

### 836 **Data Availability**

837 The data in this study are available from the corresponding author upon request, and  
838 will be available on Figshare upon online publication.

### 839 **Author Contributions**

840 D.A., N.T., and J.J.A.V.B. conceived of the initial extension of Lunghi et al (2014)  
841 into an EEG paradigm. D.A. contributed tactile-stimulation equipment and code for  
842 auditory stimulus construction. M.J.D designed and programmed the research  
843 experiment reported in this article, with feedback from N.T. and J.J.A.V.B. M.J.D  
844 collected the experimental data. M.J.D performed the initial behavioral and EEG  
845 analysis, with feedback from J.J.A.V.B. and N.T. M.J.D conceived of and performed  
846 the attentional sampling analysis with feedback from N.T. and J.J.A.V.B. M.J.D.  
847 wrote the article, with feedback from D.A, N.T. and J.J.A.V.B.

### 848 **Acknowledgements**

849 M.J.D. was supported by an Australian Government Research Training Program  
850 Scholarship. D.A. was funded by an Australian Research Council Discovery Project

851 (DP150101731). N.T. was funded by an Australian Research Council Future  
852 Fellowship (FT120100619) and Discovery Project (DP130100194). The authors thank  
853 Bryan Paton and Claudia Lunghi for technical advice, and Brandon Lam for early  
854 piloting of the experimental paradigm.

855

#### 856 **Competing Financial Interests**

857 The authors declare they have no competing financial interests.

858

859

860

861

862

863

864

865

866

867

868

869

870

871

872

873

874

875

876

## References

- 877 Alais, D. (2012). Binocular rivalry: Competition and inhibition in visual perception.  
878 *Wiley Interdisciplinary Reviews: Cognitive Science*, 3(1), 87–103.  
879 <http://doi.org/10.1002/wcs.151>
- 880 Alais, D., & Blake, R. (2005). *Binocular rivalry*. MIT press.
- 881 Bahrami, B., Lavie, N., & Rees, G. (2007). Attentional Load Modulates Responses of  
882 Human Primary Visual Cortex to Invisible Stimuli. *Current Biology*, 17(6), 509–  
883 513. <http://doi.org/10.1016/j.cub.2007.01.070>
- 884 Bastos, A. M., & Schoffelen, J.-M. (2016). A Tutorial Review of Functional  
885 Connectivity Analysis Methods and Their Interpretational Pitfalls. *Frontiers in*  
886 *Systems Neuroscience*, 9, 175. <http://doi.org/10.3389/fnsys.2015.00175>
- 887 Battelli, L., Pascual-Leone, A., & Cavanagh, P. (2007). The “when” pathway of the  
888 right parietal lobe. *Trends in Cognitive Sciences*, 11(5), 204–210.  
889 <http://doi.org/10.1016/j.tics.2007.03.001>
- 890 Beauchamp, M. S. (2005). See me, hear me, touch me: Multisensory integration in  
891 lateral occipital-temporal cortex. *Current Opinion in Neurobiology*, 15(2), 145–  
892 153. <http://doi.org/10.1016/j.conb.2005.03.011>
- 893 Benjamin, D. J., Berger, J. O., Johannesson, M., Nosek, B. A., Wagenmakers, E.-J.,  
894 Berk, R., ... Johnson, V. E. (2017). Redefine statistical significance. *Nature*



- 895        *Human Behaviour*. <http://doi.org/10.1038/s41562-017-0189-z>
- 896    Benjamini, Y., & Yekutieli, D. (2001). The Control of the False Discovery Rate in  
897        Multiple Testing under Dependency. *The Annals of Statistics*, 29(4), 1165–1188.
- 898    Blake, R., O’Shea, R. P., & Mueller, T. J. (1992). Spatial zones of binocular rivalry in  
899        central and peripheral vision. *Visual Neuroscience*, 8(5), 469–478.
- 900    Bokil, H., Andrews, P., Kulkarni, J. E., Mehta, S., & Mitra, P. P. (2010). Chronux: A  
901        platform for analyzing neural signals. *Journal of Neuroscience Methods*, 192(1),  
902        146–151. <http://doi.org/10.1016/j.jneumeth.2010.06.020>
- 903    Brainard, D. H. (1997). The Psychophysics Toolbox. *Spatial Vision*, 10, 433–436.  
904        <http://doi.org/10.1163/156856897X00357>
- 905    Busch, N. A., Dubois, J., & VanRullen, R. (2009). The phase of ongoing EEG  
906        oscillations predicts visual perception. *The Journal of Neuroscience*, 29(24),  
907        7869–7876. <http://doi.org/10.1523/JNEUROSCI.0113-09.2009>
- 908    Busch, N., & VanRullen, R. (2010). Spontaneous EEG oscillations reveal periodic  
909        sampling of visual attention. *Proceedings of the National Academy of Sciences*,  
910        107(37), 16048–16053. <http://doi.org/10.1073/pnas.1004801107>
- 911    Bushara, K. O., Hanakawa, T., Immisch, I., Toma, K., Kansaku, K., & Hallett, M.  
912        (2003). Neural correlates of cross-modal binding. *Nature Neuroscience*, 6(2),  
913        190–195. <http://doi.org/10.1038/mn993>

- 914 Calvert, G. A., & Thesen, T. (2004). Multisensory integration: Methodological  
915 approaches and emerging principles in the human brain. *Journal of Physiology-*  
916 *Paris*, 98(1–3), 191–205. <http://doi.org/10.1016/j.jphysparis.2004.03.018>
- 917 Chakravarthi, R., & VanRullen, R. (2012). Conscious updating is a rhythmic process.  
918 *Proceedings of the National Academy of Sciences*, 109(26), 10599–10604.  
919 <http://doi.org/10.1073/pnas.1121622109>
- 920 Chen, A., Wang, A., Wang, T., Tang, X., & Zhang, M. (2017). Behavioral  
921 Oscillations in Visual Attention Modulated by Task Difficulty. *Frontiers in*  
922 *Psychology*, 8, 1630. <http://doi.org/10.3389/fpsyg.2017.01630>
- 923 Chica, A. B., & Bartolomeo, P. (2012). Attentional routes to conscious perception.  
924 *Frontiers in Psychology*, 3, 1. <http://doi.org/10.3389/fpsyg.2012.00001>
- 925 Cohen, M. A., & Dennett, D. C. (2011). Consciousness cannot be separated from  
926 function. *Trends in Cognitive Sciences*, 15(8), 358–364.  
927 <http://doi.org/10.1016/j.tics.2011.06.008>
- 928 Conrad, V., Bartels, A., Kleiner, M., & Noppeney, U. (2010). Audiovisual  
929 interactions in binocular rivalry. *Journal of Vision*, 10(10), 27.  
930 <http://doi.org/10.1167/10.10.27>
- 931 Corbetta, M., & Shulman, G. L. (2002). Control of goal-directed and stimulus-driven  
932 attention in the brain. *Nature Reviews Neuroscience*, 3(3), 201–215.  
933 <http://doi.org/10.1038/nrn755>

- 934 Dehaene, S., Changeux, J. P., Naccache, L., Sackur, J., & Sergent, C. (2006).  
935 Conscious, preconscious, and subliminal processing: a testable taxonomy.  
936 *Trends in Cognitive Sciences*, 10(5), 204–211.  
937 <http://doi.org/10.1016/j.tics.2006.03.007>
- 938 Deroy, O., Chen, Y., & Spence, C. (2014). Multisensory constraints on awareness.  
939 *Philosophical Transactions of the Royal Society of London. Series B, Biological*  
940 *Sciences*, 369(1641), 20130207. <http://doi.org/10.1098/rstb.2013.0207>
- 941 Deroy, O., Faivre, N., Lunghi, C., Spence, C., Aller, M., & Noppeney, U. (2016). The  
942 Complex Interplay Between Multisensory Integration and Perceptual Awareness.  
943 *Multisensory Research*, 29(6–7), 585–606. [http://doi.org/10.1163/22134808-](http://doi.org/10.1163/22134808-00002529)  
944 [00002529](http://doi.org/10.1163/22134808-00002529)
- 945 Dieter, K. C., Brascamp, J., Tadin, D., & Blake, R. (2016). Does visual attention drive  
946 the dynamics of bistable perception? *Attention, Perception, & Psychophysics*,  
947 78(7), 1861–1873. <http://doi.org/10.3758/s13414-016-1143-2>
- 948 Dieter, K. C., & Tadin, D. (2011). Understanding Attentional Modulation of  
949 Binocular Rivalry: A Framework Based on Biased Competition. *Frontiers in*  
950 *Human Neuroscience*, 5, 155. <http://doi.org/10.3389/fnhum.2011.00155>
- 951 Downar, J., Crawley, A. P., Mikulis, D. J., & Davis, K. D. (2000). A multimodal  
952 cortical network for the detection of changes in the sensory environment. *Nature*  
953 *Neuroscience*, 3(3), 277–283. <http://doi.org/10.1038/72991>

- 954 Driver, J., & Noesselt, T. (2008). Multisensory Interplay Reveals Crossmodal  
955 Influences on “Sensory-Specific” Brain Regions, Neural Responses, and  
956 Judgments. *Neuron*, 57(1), 11–23. <http://doi.org/10.1016/j.neuron.2007.12.013>
- 957 Dugué, L., McLelland, D., Lajous, M., & VanRullen, R. (2015). Attention searches  
958 nonuniformly in space and in time. *Proceedings of the National Academy of*  
959 *Sciences*, 112(49), 15214–15219. <http://doi.org/10.1073/pnas.1511331112>
- 960 Dugué, L., Merriam, E. P., Heeger, D. J., & Carrasco, M. (2017). Specific Visual  
961 Subregions of TPJ Mediate Reorienting of Spatial Attention. *Cerebral Cortex*,  
962 1–16. <http://doi.org/10.1093/cercor/bhx140>
- 963 Dugué, L., Roberts, M., & Carrasco, M. (2016). Attention Reorients Periodically.  
964 *Current Biology*, 26(12), 1595–1601. <http://doi.org/10.1016/j.cub.2016.04.046>
- 965 Dugué, L., & VanRullen, R. (2014). The dynamics of attentional sampling during  
966 visual search revealed by Fourier analysis of periodic noise interference. *Journal*  
967 *of Vision*, 14, 1–15. <http://doi.org/10.1167/14.2.11>
- 968 Dugué, L., Xue, A. M., & Carrasco, M. (2017). Distinct perceptual rhythms for  
969 feature and conjunction searches. *Journal of Vision*, 17(3), 22.  
970 <http://doi.org/10.1167/17.3.22>
- 971 Fiebelkorn, I. C., Saalmann, Y. B., & Kastner, S. (2013). Rhythmic sampling within  
972 and between objects despite sustained attention at a cued location. *Current*  
973 *Biology*, 23(24), 2553–2558. <http://doi.org/10.1016/j.cub.2013.10.063>

- 974 Frey, J. N., Ruhnau, P., & Weisz, N. (2015). Not so different after all: The same  
975 oscillatory processes support different types of attention. *Brain Research*, 1626,  
976 183–197. <http://doi.org/10.1016/j.brainres.2015.02.017>
- 977 Fujisaki, W., & Nishida, S. (2005). Temporal frequency characteristics of synchrony-  
978 asynchrony discrimination of audio-visual signals. *Experimental Brain Research*,  
979 166(3–4), 455–464. <http://doi.org/10.1007/s00221-005-2385-8>
- 980 Fujisaki, W., & Nishida, S. (2010). A common perceptual temporal limit of binding  
981 synchronous inputs across different sensory attributes and modalities.  
982 *Proceedings of the Royal Society B: Biological Sciences*, 277(1692), 2281–90.  
983 <http://doi.org/10.1098/rspb.2010.0243>
- 984 Guggisberg, A. G., Dalal, S. S., Schnider, A., & Nagarajan, S. S. (2011). The neural  
985 basis of event-time introspection. *Consciousness and Cognition*, 20(4), 1899–  
986 1915. <http://doi.org/10.1016/j.concog.2011.03.008>
- 987 Guzman-Martinez, E., Ortega, L., Grabowecky, M., Mossbridge, J., & Suzuki, S.  
988 (2012). Interactive coding of visual spatial frequency and auditory amplitude-  
989 modulation rate. *Current Biology*, 22(5), 383–388.  
990 <http://doi.org/10.1016/j.cub.2012.01.004>
- 991 Hanslmayr, S., Volberg, G., Wimber, M., Dalal, S. S., & Greenlee, M. W. (2013).  
992 Prestimulus oscillatory phase at 7 Hz gates cortical information flow and visual  
993 perception. *Current Biology*, 23(22), 2273–2278.  
994 <http://doi.org/10.1016/j.cub.2013.09.020>

995 Hartcher-O'Brien, J., Talsma, D., Adam, R., Vercillo, T., Macaluso, E., & Noppeney,  
996 U. (2016). The Curious Incident of Attention in Multisensory Integration:  
997 Bottom-up vs. Top-down. *Multisensory Research*.  
998 <http://doi.org/10.1163/22134808-00002528>

999 Hogendoorn, H. (2016). Voluntary Saccadic Eye Movements Ride the Attentional  
1000 Rhythm. *Journal of Cognitive Neuroscience*, 28(10), 1625–1635.  
1001 <http://doi.org/10.1162/jocn>

1002 Holcombe, A. O. (2009). Seeing slow and seeing fast: two limits on perception.  
1003 *Trends in Cognitive Sciences*, 13(5), 216–221.  
1004 <http://doi.org/10.1016/j.tics.2009.02.005>

1005 Holcombe, A. O., & Chen, W.-Y. (2013). Splitting attention reduces temporal  
1006 resolution from 7 Hz for tracking one object to <math>\approx 3</math> Hz when tracking three.  
1007 *Journal of Vision*, 13(1), 12–12. <http://doi.org/10.1167/13.1.12>

1008 Huang, Y., Chen, L., & Luo, H. (2015). Behavioral Oscillation in Priming:  
1009 Competing Perceptual Predictions Conveyed in Alternating Theta-Band  
1010 Rhythms. *Journal of Neuroscience*, 35(6), 2830–2837.  
1011 <http://doi.org/10.1523/JNEUROSCI.4294-14.2015>

1012 Jack, B. N., & Hacker, G. (2014). Predictive Coding Explains Auditory and Tactile  
1013 Influences on Vision during Binocular Rivalry. *Journal of Neuroscience*, 34(19),  
1014 6423–6424. <http://doi.org/10.1523/JNEUROSCI.1040-14.2014>

- 1015 Kanai, R., Tsuchiya, N., & Verstraten, F. a J. (2006). The Scope and Limits of Top-  
1016 Down Attention in Unconscious Visual Processing. *Current Biology*, *16*(23),  
1017 2332–2336. <http://doi.org/10.1016/j.cub.2006.10.001>
- 1018 Kang, M.-S., & Blake, R. (2005). Perceptual synergy between seeing and hearing  
1019 revealed during binocular rivalry. *Psichologija*, *32*, 7–15.lunghi
- 1020 Koch, C., & Tsuchiya, N. (2007). Attention and consciousness: two distinct brain  
1021 processes. *Trends in Cognitive Sciences*, *11*(1), 16–22.  
1022 <http://doi.org/10.1016/j.tics.2006.10.012>
- 1023 Lakatos, P., O’Connell, M. N., Barczak, A., Mills, A., Javitt, D. C., & Schroeder, C.  
1024 E. (2009). The Leading Sense: Supramodal Control of Neurophysiological  
1025 Context by Attention. *Neuron*, *64*(3), 419–430.  
1026 <http://doi.org/10.1016/j.neuron.2009.10.014>
- 1027 Lamme, V. A. F. (2003). Why visual attention and awareness are different. *Trends in*  
1028 *Cognitive Sciences*, *7*(1), 12–18. [http://doi.org/10.1016/S1364-6613\(02\)00013-X](http://doi.org/10.1016/S1364-6613(02)00013-X)
- 1029 Landau, A. N., & Fries, P. (2012). Attention samples stimuli rhythmically. *Current*  
1030 *Biology*, *22*(11), 1000–1004. <http://doi.org/10.1016/j.cub.2012.03.054>
- 1031 Landau, A. N., Schreyer, H. M., van Pelt, S., & Fries, P. (2015). Distributed Attention  
1032 Is Implemented through Theta-Rhythmic Gamma Modulation. *Current Biology*,  
1033 *25*(17), 2332–2337. <http://doi.org/10.1016/j.cub.2015.07.048>

- 1034 Tsuchiya, N., & Koch, C. (2015). The relationship between consciousness and top-  
1035 down attention. In S. Laureys, O. Gosseries, & G. Tononi (Eds.). *The neurology*  
1036 *of consciousness: cognitive neuroscience and neuropathology* (71–94).  
1037 Academic Press.
- 1038 Lin, Z., & He, S. (2009). Seeing the invisible: The scope and limits of unconscious  
1039 processing in binocular rivalry. *Progress in Neurobiology*, 87(4), 195–211.  
1040 <http://doi.org/10.1016/j.pneurobio.2008.09.002>
- 1041 Lunghi, C., & Alais, D. (2013). Touch Interacts with Vision during Binocular Rivalry  
1042 with a Tight Orientation Tuning. *PLoS ONE*, 8(3), 1–8.  
1043 <http://doi.org/10.1371/journal.pone.0058754>
- 1044 Lunghi, C., & Alais, D. (2015). Congruent tactile stimulation reduces the strength of  
1045 visual suppression during binocular rivalry. *Scientific Reports*, 5.  
1046 <http://doi.org/10.1038/srep09413>
- 1047 Lunghi, C., Binda, P., & Morrone, M. C. (2010). Touch disambiguates rivalrous  
1048 perception at early stages of visual analysis. *Current Biology*, 20(4), R143-4.  
1049 <http://doi.org/10.1016/j.cub.2009.12.015>
- 1050 Lunghi, C., Morrone, M. C., & Alais, D. (2014). Auditory and tactile signals combine  
1051 to influence vision during binocular rivalry. *The Journal of Neuroscience*, 34(3),  
1052 784–92. <http://doi.org/10.1523/JNEUROSCI.2732-13.2014>
- 1053 Maier, A., Panagiotaropoulos, T. I., Tsuchiya, N., & Keliris, G. A. (2012).



- 1054 Introduction to research topic–binocular rivalry: a gateway to studying  
1055 consciousness. *Binocular Rivalry: A Gateway to Consciousness*, 6(7), 5.
- 1056 Maris, E., & Oostenveld, R. (2007). Nonparametric statistical testing of EEG- and  
1057 MEG-data. *Journal of Neuroscience Methods*, 164(1), 177–190.  
1058 <http://doi.org/10.1016/j.jneumeth.2007.03.024>
- 1059 Mathewson, K. E., Gratton, G., Fabiani, M., Beck, D. M., & Ro, T. (2009). To See or  
1060 Not to See: Prestimulus Phase Predicts Visual Awareness. *Journal of*  
1061 *Neuroscience*, 29(9), 2725–2732. [http://doi.org/10.1523/JNEUROSCI.3963-](http://doi.org/10.1523/JNEUROSCI.3963-08.2009)  
1062 08.2009
- 1063 Mercier, M. R., Foxe, J. J., Fiebelkorn, I. C., Butler, J. S., Schwartz, T. H., &  
1064 Molholm, S. (2013). Auditory-driven phase reset in visual cortex: Human  
1065 electrocorticography reveals mechanisms of early multisensory integration.  
1066 *NeuroImage*, 79, 19–29. <http://doi.org/10.1016/j.neuroimage.2013.04.060>
- 1067 Merikle, P. M., & Joordens, S. (1997). Parallels between perception without attention  
1068 and perception without awareness. *Consciousness and Cognition*, 6(2–3), 219–  
1069 236. <http://doi.org/10.1006/ccog.1997.0310>
- 1070 Mitchell, J. F., Stoner, G. R., & Reynolds, J. H. (2004). Object-based attention  
1071 determines dominance in binocular rivalry. *Nature*, 429(6990), 410–413.  
1072 <http://doi.org/10.1038/nature02584>
- 1073 Morillon, B., Schroeder, C. E., & Wyart, V. (2015). Motor contributions to the

- 1074 temporal precision of auditory attention. *Nature Communications*, 5, 1–9.  
1075 <http://doi.org/10.1038/ncomms6255>
- 1076 O'Regan, J. K., & Noë, A. (2001). A sensorimotor account of vision and visual  
1077 consciousness. *Behavioral and Brain Sciences*, 24(5), 939–973.  
1078 <http://doi.org/10.1017/S0140525X01000115>
- 1079 O'Shea, R. P., & Blake, R. (1986). Dichoptic temporal frequency differences do not  
1080 lead to binocular rivalry. *Perception & Psychophysics*, 39(1), 59–63.  
1081 <http://doi.org/10.3758/BF03207584>
- 1082 Paffen, C. L. E., & Alais, D. (2011). Attentional Modulation of Binocular Rivalry.  
1083 *Frontiers in Human Neuroscience*, 5, 105.  
1084 <http://doi.org/10.3389/fnhum.2011.00105>
- 1085 Posner, M. I. (1994). Attention: the mechanisms of consciousness. *Proceedings of the*  
1086 *National Academy of Sciences*, 91(16), 7398–7403.
- 1087 Posner, M. I. (2012). Attentional networks and consciousness. *Frontiers in*  
1088 *Psychology*, 3, 64. <http://doi.org/10.3389/fpsyg.2012.00064>
- 1089 Proskovec, A. L., Heinrichs-Graham, E., Wiesman, A. I., McDermott, T. J., &  
1090 Wilson, T. W. (2018). Oscillatory dynamics in the dorsal and ventral attention  
1091 networks during the reorienting of attention. *Human Brain Mapping*, 39(5),  
1092 2177–2190. <http://doi.org/10.1002/hbm.23997>

- 1093 Romei, V., Gross, J., & Thut, G. (2012). Sounds reset rhythms of visual cortex and  
1094 corresponding human visual perception. *Current Biology*, 22(9), 807–813.  
1095 <http://doi.org/10.1016/j.cub.2012.03.025>
- 1096 Ronconi, L., Oosterhof, N. N., Bonmassar, C., & Melcher, D. (2017). Multiple  
1097 oscillatory rhythms determine the temporal organization of perception.  
1098 *Proceedings of the National Academy of Sciences*, 114(51), 1345–13440.  
1099 <http://doi.org/10.1073/pnas.1714522114>
- 1100 Schroeder, C. E., & Lakatos, P. (2009). Low-frequency neuronal oscillations as  
1101 instruments of sensory selection. *Trends in Neurosciences*, 32(1), 9–18.  
1102 <http://doi.org/10.1016/j.tins.2008.09.012>
- 1103 Schroeder, C. E., Wilson, D. A., Radman, T., Scharfman, H., & Lakatos, P. (2010).  
1104 Dynamics of Active Sensing and perceptual selection. *Current Opinion in*  
1105 *Neurobiology*, 20(2), 172–176. <http://doi.org/10.1016/j.conb.2010.02.010>
- 1106 Song, K., Meng, M., Chen, L., Zhou, K., & Luo, H. (2014). Behavioral Oscillations in  
1107 Attention: Rhythmic  $\alpha$  Pulses Mediated through  $\theta$  Band. *Journal of*  
1108 *Neuroscience*, 34(14), 4837–4844. [http://doi.org/10.1523/JNEUROSCI.4856-](http://doi.org/10.1523/JNEUROSCI.4856-13.2014)  
1109 [13.2014](http://doi.org/10.1523/JNEUROSCI.4856-13.2014)
- 1110 Spaak, E., de Lange, F. P., & Jensen, O. (2014). Local entrainment of alpha  
1111 oscillations by visual stimuli causes cyclic modulation of perception. *The*  
1112 *Journal of Neuroscience*, 34(10), 3536–3544.

- 1113 Talsma, D., Senkowski, D., Soto-Faraco, S., & Woldorff, M. G. (2010). The  
1114 multifaceted interplay between attention and multisensory integration. *Trends in*  
1115 *Cognitive Sciences*, 14(9), 400–410. <http://doi.org/10.1016/j.tics.2010.06.008>
- 1116 Thorne, J. D., & Debener, S. (2014). Look now and hear what's coming: On the  
1117 functional role of cross-modal phase reset. *Hearing Research*, 307, 144–152.  
1118 <http://doi.org/10.1016/j.heares.2013.07.002>
- 1119 Tomassini, A., Ambrogioni, L., Medendorp, W. P., & Maris, E. (2017). Theta  
1120 oscillations locked to intended actions rhythmically modulate perception. *eLife*,  
1121 6(e25618).
- 1122 Tomassini, A., Spinelli, D., Jacono, M., Sandini, G., & Morrone, M. C. (2015).  
1123 Rhythmic Oscillations of Visual Contrast Sensitivity Synchronized with Action.  
1124 *Journal of Neuroscience*, 35(18), 7019–7029.  
1125 <http://doi.org/10.1523/JNEUROSCI.4568-14.2015>
- 1126 van Atteveldt, N., Murray, M. M., Thut, G., & Schroeder, C. E. (2014). Multisensory  
1127 integration: Flexible use of general operations. *Neuron*, 81(6), 1240–1253.  
1128 <http://doi.org/10.1016/j.neuron.2014.02.044>
- 1129 van Boxtel, J. J. A., Alais, D., Erkelens, C. J., & van Ee, R. (2008). The role of  
1130 temporally coarse form processing during binocular rivalry. *PLoS ONE*, 3(1).  
1131 <http://doi.org/10.1371/journal.pone.0001429>
- 1132 van Boxtel, J. J. A., Knapen, T., Erkelens, C. J., & van Ee, R. (2008). Removal of

- 1133           monocular interactions equates rivalry behavior for monocular, binocular, and  
1134           stimulus rivalries. *Journal of Vision*, 813(15), 1–17.  
1135           <http://doi.org/10.1167/8.15.13>
- 1136   van Boxtel, J. J. A., Tsuchiya, N., & Koch, C. (2010). Consciousness and attention:  
1137           On sufficiency and necessity. *Frontiers in Psychology*, 1(DEC), 1–13.  
1138           <http://doi.org/10.3389/fpsyg.2010.00217>
- 1139   van Boxtel, J. J. A., van Ee, R., & Erkelens, C. J. (2007). Dichoptic masking and  
1140           binocular rivalry share common perceptual dynamics. *Journal of Vision*, 7(14),  
1141           3–3. <http://doi.org/10.1167/7.14.3>
- 1142   van Driel, J., Knapen, T., van Es, D. M., & Cohen, M. X. (2014). Interregional alpha-  
1143           band synchrony supports temporal cross-modal integration. *NeuroImage*, 101,  
1144           404–415. <http://doi.org/10.1016/j.neuroimage.2014.07.022>
- 1145   van Ee, R., van Boxtel, J. J. A., Parker, A. L., & Alais, D. (2009). Multisensory  
1146           congruency as a mechanism for attentional control over perceptual selection. *The*  
1147           *Journal of Neuroscience* □: *The Official Journal of the Society for Neuroscience*,  
1148           29(37), 11641–11649. <http://doi.org/10.1523/JNEUROSCI.0873-09.2009>
- 1149   Vanrullen, R. (2013). Visual attention: A rhythmic process? *Current Biology*, 23(24),  
1150           R1110–R1112. <http://doi.org/10.1016/j.cub.2013.11.006>
- 1151   VanRullen, R. (2016a). Perceptual cycles. *Trends in Cognitive Sciences*, 20(10), 723–  
1152           735. <http://doi.org/10.1167/15.12.1401>

- 1153 VanRullen, R. (2016b). Perceptual Rhythms. *Stevens' Handbook of Experimental*  
1154 *Psychology*, 1–51.
- 1155 VanRullen, R., Carlson, T., & Cavanagh, P. (2007). The blinking spotlight of  
1156 attention. *Proceedings of the National Academy of Sciences*, 104(49), 19204–  
1157 19209. <http://doi.org/10.1073/pnas.0707316104>
- 1158 VanRullen, R., & Dubois, J. (2011). The psychophysics of brain rhythms. *Frontiers in*  
1159 *Psychology*, 2(AUG), 1–10. <http://doi.org/10.3389/fpsyg.2011.00203>
- 1160 Vroomen, J., & Keetels, M. (2010). Perception of intersensory synchrony. *Attention,*  
1161 *Perception & Psychophysics*, 72(4), 871–884. <http://doi.org/10.3758/APP>
- 1162 Watanabe, M., Cheng, K., Murayama, Y., Ueno, K., Asamizuya, T., Tanaka, K., &  
1163 Logothetis, N. (2011). Attention but not awareness modulates the BOLD signal  
1164 in the human V1 during binocular suppression. *Science*, 334(6057), 829–831.
- 1165 Zhang, D., Hong, B., Gao, X., Gao, S., & Röder, B. (2011). Exploring steady-state  
1166 visual evoked potentials as an index for intermodal and crossmodal spatial  
1167 attention. *Psychophysiology*, 48(5), 665–675. <http://doi.org/10.1111/j.1469->  
1168 [8986.2010.01132.x](http://doi.org/10.1111/j.1469-8986.2010.01132.x)
- 1169 Zhang, P., Jamison, K., Engel, S., He, B., & He, S. (2011). Binocular Rivalry  
1170 Requires Visual Attention. *Neuron*, 71(2), 362–369.  
1171 <http://doi.org/10.1016/j.neuron.2011.05.035>

1172 Zoefel, B., & VanRullen, R. (2017). Oscillatory mechanisms of stimulus processing  
1173 and selection in the visual and auditory systems: State-of-the-art, speculations  
1174 and suggestions. *Frontiers in Neuroscience, 11*, 296.  
1175 <http://doi.org/10.3389/fnins.2017.00296>

1176

1177

1178

1179

1180

1181

1182

1183

1184

1185

1186

1187 **Supplemental Figures**

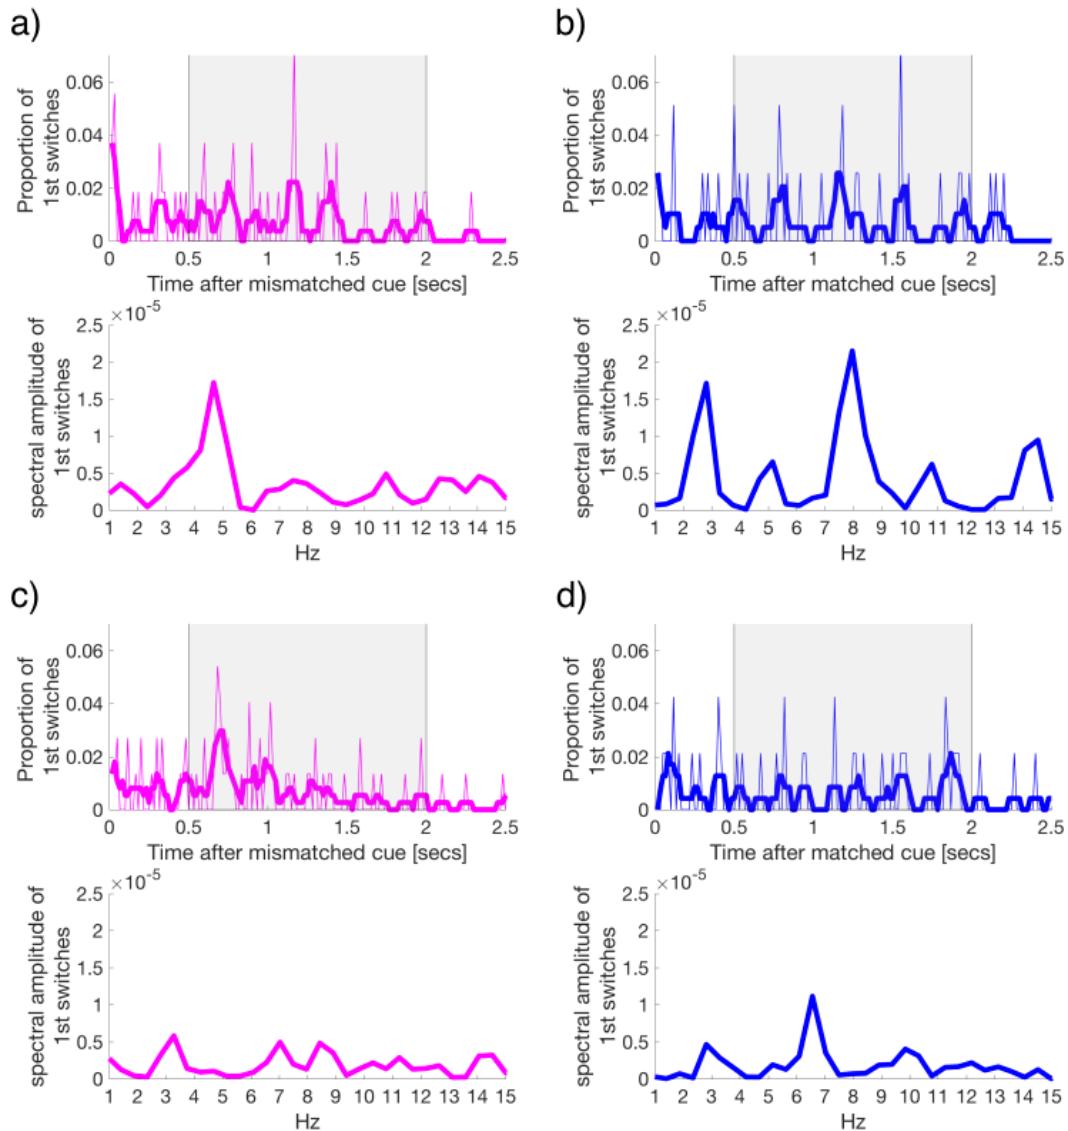

1188  
1189

1190 *Supplemental Figure 1, related to Figure 2. Representative subject data*  
1191 *demonstrating that the strength of attentional sampling varies across subjects.*  
1192 *Perceptual switches recorded during binocular rivalry after attended low-frequency*  
1193 *cues either a,c) mismatched, or b,d) matched with the dominant percept at cue onset.*  
1194 *a-d)Top panels show the first perceptual switches after crossmodal cue at each time-*  
1195 *point, binned over 16.7 ms intervals. Bottom panels show the spectra of these time-*  
1196 *courses following FFT within the grey-shaded time window, 500-2000 ms after cue*  
1197 *onset.*



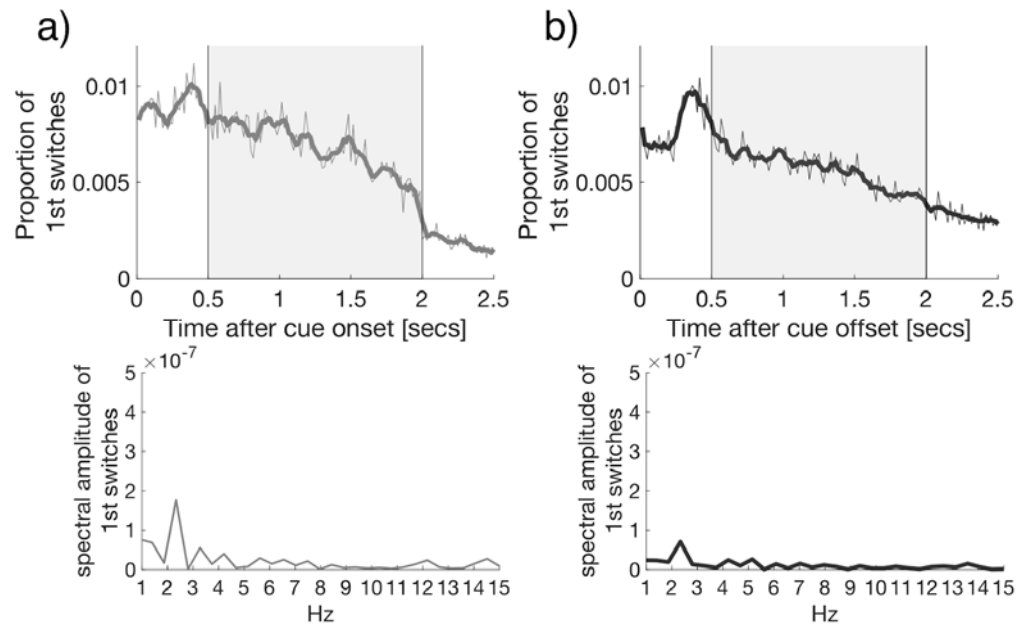

1198

1199

1200

1201 *Supplemental Figure 2, related to Figure 2. The time course of the proportion of first*

1202 *switches made at each time point; following any crossmodal cue onset (a), and*

1203 *following crossmodal cue offset (b). An analysis of the time-course of perceptual*

1204 *switches reveals no significant spectral peaks at 3.5 or 8 Hz. Y-axis scaled as per*

1205 *Figure 2f. The presence of an early peak (0 - 0.5 s) in the proportion of first switches*

1206 *suggests that these changes may be due to stimulus transients, rather than the cue-*

1207 *conditional allocation of attention. As such this early time-window was omitted from*

1208 *subsequent analysis.*

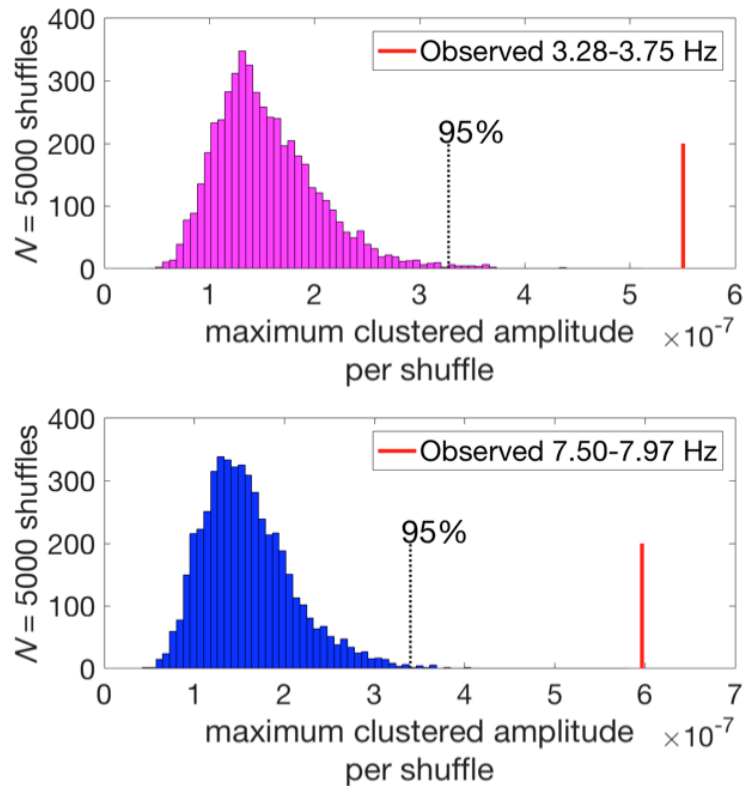

1209

1210

1211 *Supplemental Figure 3, related to Figure 2f. The null-distributions for the surrogate*  
1212 *datasets generated by the randomization procedure, and the actually observed values*  
1213 *of second-stage statistics (i.e., maximum and its highest neighbor's summed Fourier*  
1214 *amplitude). After satisfying first-level criteria ( $p < .005$  uncorrected for two*  
1215 *neighboring frequencies), we proceeded to this second-stage statistical test. The*  
1216 *observed second-stage statistics (red line) were regarded as significant after cluster*  
1217 *corrections for multiple comparisons at  $p < .05$  level; exceeding the top 95% of the*  
1218 *null distribution.*

1219

1220

a) Attended high-frequency

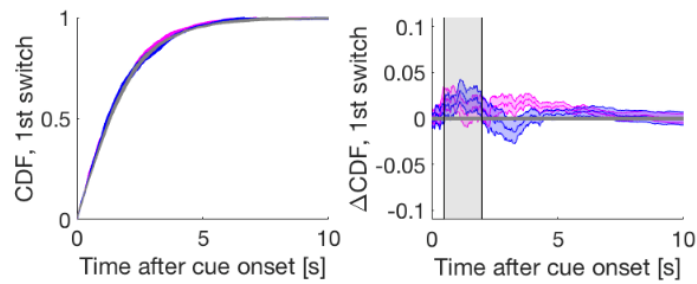

b) Non-attended low-frequency

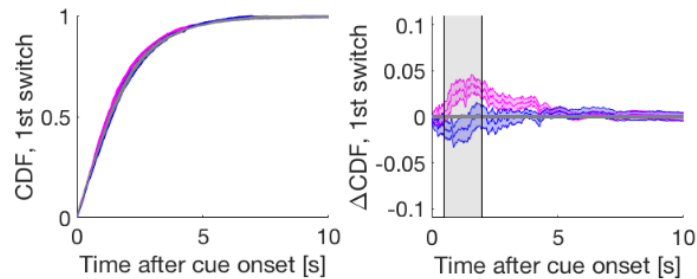

c) Non-attended high-frequency

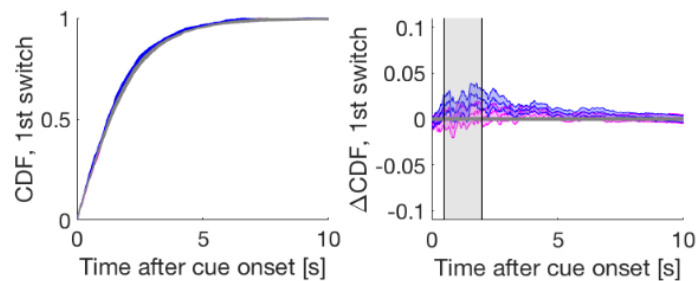

1221  
1222

1223 *Supplemental Figure 4, related to Figure 2. Left column) The cumulative density*  
1224 *function (CDF) of the time to first-switch for all conditions other than attended low-*  
1225 *frequency. Mismatched, matched, and visual-only conditions are colored in magenta,*  
1226 *blue, and grey in all panels. Lines and shading show mean and standard error across*  
1227 *subjects (N=34). Right column) the difference in CDF between conditions, each of*  
1228 *which failed to exhibit any significant crossmodal effects on perceptual switches*  
1229 *compared to visual only periods (FDR  $q = .05$ ). Thus, we did not pursue further*  
1230 *spectral or neural analyses of these conditions.*  
1231

a) 3.5 Hz ITPC

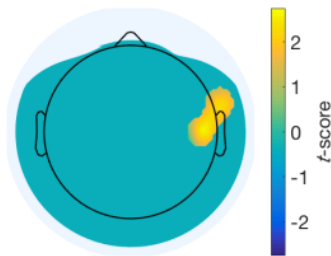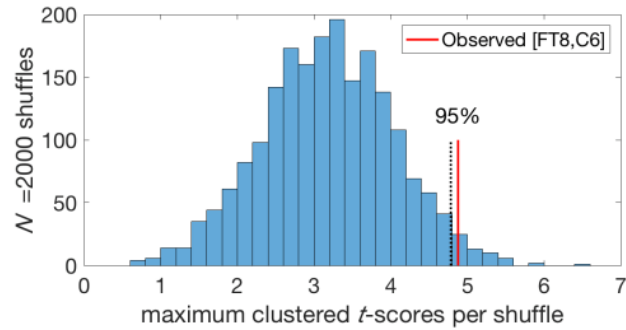

b) 8 Hz ITPC

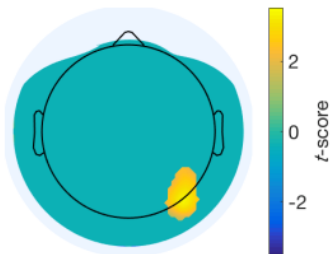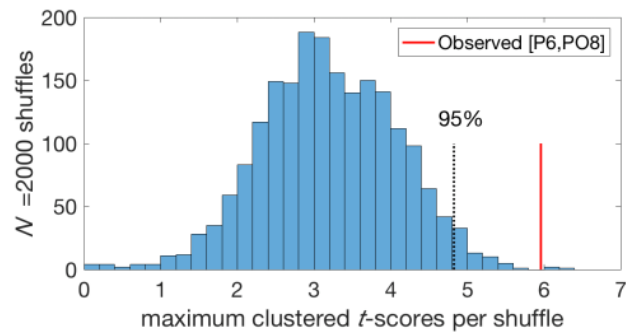

1232  
1233

1234 *Supplemental Figure 5, related to Figure 3. Displayed are the regions selected for*  
1235 *correlation analysis after satisfying our two-stage statistical tests on evoked ITPC,*  
1236 *comparing mismatched and matched conditions for a) 3.5 Hz and b) 8 Hz. The right*  
1237 *panels display the resulting null distributions obtained after the permutation of*  
1238 *condition labels (mismatched vs matched) and performing t-tests across subjects on*  
1239 *the mean evoked ITPC for each electrode after upsampling (see Method). The*  
1240 *maximum clustered t-scores per shuffle were retained to create the null distributions.*  
1241 *The observed sum of t-scores is displayed as a vertical red line, while the top 95% of*  
1242 *the distribution is marked with a vertical dotted back line.*  
1243

1244

1245

1246

1247

1248

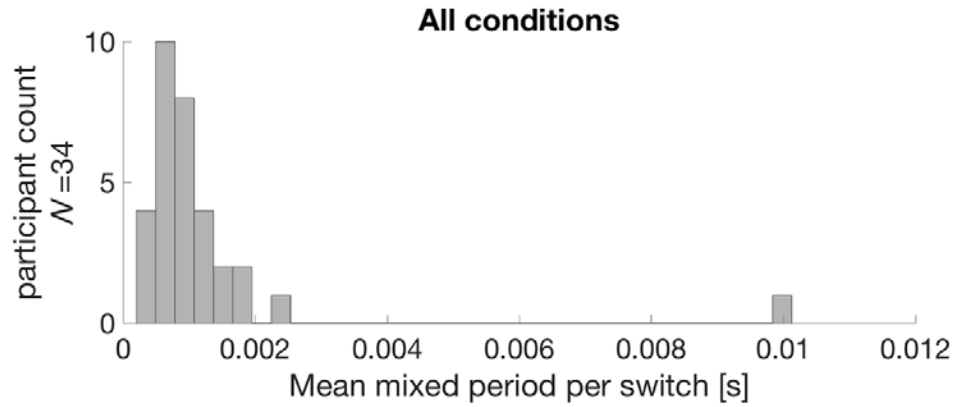

1249

1250 *Supplemental Figure 6. Across all experimental periods, the average duration of*  
1251 *mixed periods per switch per subject was less than 16.7 ms (our binning width), thus*  
1252 *showing that mixed percepts are unlikely to have contributed to an increase in the*  
1253 *variance of perceptual report timing. Switches happened instantly, with zero or one*  
1254 *mixed frame (16.7 ms) on average.*

1255

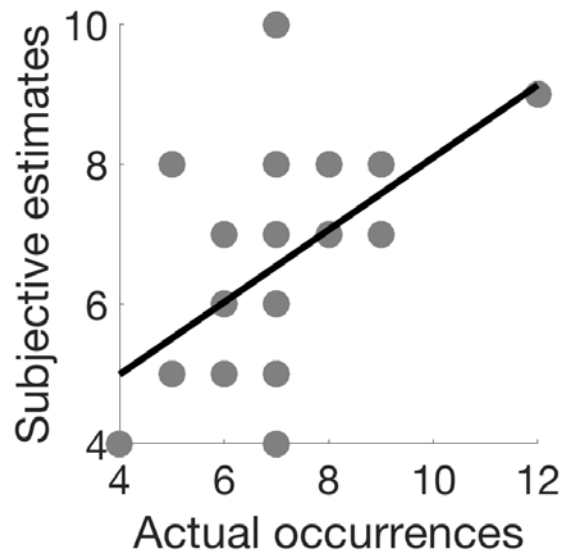

1256

1257

1258 *Supplemental Figure 7, related to Figure 1c. Definition of “attention to cues” in*  
1259 *Figure 1c. Y- and x-axes of this figure are the subjective and actual congruent*  
1260 *crossmodal and visual stimuli in the attended sessions from one exemplary*  
1261 *subject. We defined the correlation coefficient between the two (here,  $r = .55$ ) as the*  
1262 *‘attention to cue’ index used as x-axis in Figure 1c.*

1263
